# 1 A role for long-range, through-lattice coupling in microtubule catastrophe

2 Tae Kim and Luke M. Rice \*

3  
4 UT Southwestern Medical Center, Departments of Biophysics and Biochemistry, 5323  
5 Harry Hines Blvd, Dallas, TX 75390

6 \* To whom correspondence should be addressed:

7 Luke Rice

8 Departments of Biophysics and Biochemistry

9 UT Southwestern Medical Center

10 5323 Harry Hines Blvd

11 Dallas, TX 75390

12 (214) 645-5931

13 Luke.Rice@UTSouthwestern.edu

14

15 Keywords: tubulin, microtubule, dynamics, modeling, catastrophe, conformation,  
16 through-lattice, accommodation

17

18 Running head: Long-range coupling in microtubule catastrophe

19

## 20 **Abstract**

21 Microtubules are cylindrical polymers of  $\alpha\beta$ -tubulin that play critical roles in fundamental  
22 processes like chromosome segregation and vesicular transport. Microtubules display  
23 dynamic instability, switching stochastically between growing and rapid shrinking as a  
24 consequence of GTPase activity in the lattice. The molecular mechanisms behind  
25 microtubule catastrophe, the switch from growing to rapid shrinking, remain poorly  
26 defined. Indeed, two-state stochastic models that seek to describe microtubule  
27 dynamics purely in terms of the biochemical properties of GTP- and GDP-bound  $\alpha\beta$ -  
28 tubulin incorrectly predict the concentration-dependence of microtubule catastrophe.  
29 Recent studies provided evidence for three distinct conformations of  $\alpha\beta$ -tubulin in the  
30 lattice that likely correspond to GTP, GDP.P<sub>i</sub>, and GDP. The incommensurate lattices  
31 observed for these different conformations raises the possibility that in a mixed  
32 nucleotide state lattice, neighboring tubulin dimers might modulate each other's  
33 conformations and hence their biochemistry. We explored whether incorporating a  
34 GDP.P<sub>i</sub> state or the likely effects of conformational accommodation can improve  
35 predictions of catastrophe. Adding a GDP.P<sub>i</sub> intermediate did not improve the model. In  
36 contrast, adding neighbor-dependent modulation of tubulin biochemistry improved  
37 predictions of catastrophe. Conformational accommodation should propagate beyond  
38 nearest-neighbor contacts, and consequently our modeling demonstrates that long-  
39 range, through-lattice effects are important determinants of microtubule catastrophe.

40

## 41 Introduction

42 Microtubules (MTs) are hollow cylindrical polymers of  $\alpha\beta$ -tubulin that have essential  
43 roles segregating chromosomes during cell division, organizing the cytoplasm,  
44 establishing cellular polarity, and more (Desai and Mitchison, 1997). These  
45 fundamental activities depend critically on dynamic instability, the stochastic  
46 switching of MTs between phases of growing and rapid shrinking (Mitchison and  
47 Kirschner, 1984). Dynamic instability is itself a consequence of  $\alpha\beta$ -tubulin GTPase  
48 activity and how it affects interactions between  $\alpha\beta$ -tubulin in the lattice and at the  
49 microtubule end. Although a predictive molecular understanding of catastrophe  
50 remains elusive, the broad outlines of an understanding have been established  
51 (Mitchison and Kirschner, 1984; VanBuren *et al.*, 2002; Gardner *et al.*, 2011b;  
52 Bowne-Anderson *et al.*, 2013; Brouhard, 2015; Duellberg *et al.*, 2016; Brouhard and  
53 Rice, 2018). Unpolymerized, GTP-bound  $\alpha\beta$ -tubulin subunits readily associate at the  
54 growing tip of the MTs. Once incorporated into the lattice,  $\alpha\beta$ -tubulin GTPase activity  
55 is accelerated. The assembly-dependence of GTPase activity results in a “stabilizing  
56 cap” of GTP- or GDP.P<sub>i</sub>-bound  $\alpha\beta$ -tubulin near the end of the growing microtubules.  
57 Loss of this stabilizing cap triggers catastrophe, the switch from growing to rapid  
58 shrinking, because it exposes the more labile GDP-bound microtubule lattice.

59 Two broad classes of computational models have been developed as part of  
60 longstanding efforts to understand in quantitative terms the connections between the  
61 properties of individual  $\alpha\beta$ -tubulins and the polymerization dynamics they collectively  
62 generate. ‘Biochemical’ models attempt to recapitulate microtubule dynamics purely  
63 in terms of discrete ‘elementary’ molecular reactions like association, dissociation,  
64 and GTPase activity (Chen and Hill, 1983; 1985; Bayley *et al.*, 1989; 1990; Martin *et al.*,  
65 1993; VanBuren *et al.*, 2002; Gardner *et al.*, 2011b; Margolin *et al.*, 2012; Piedra  
66 *et al.*, 2016) ‘Mechanochemical’ models (Molodtsov *et al.*, 2005; VanBuren *et al.*,  
67 2005; Coombes *et al.*, 2013; Zakharov *et al.*, 2015; McIntosh *et al.*, 2018) use  
68 additional spring-like energies to account for conformational strain inside individual  
69  $\alpha\beta$ -tubulins and for how the resulting mechanical stress affects interactions with

70 other  $\alpha\beta$ -tubulins in the lattice. A third class of ‘phenomenological’ models (Flyvbjerg  
71 *et al.*, 1994; Brun *et al.*, 2009; Bowne-Anderson *et al.*, 2013; Duellberg *et al.*, 2016)  
72 uses simplifying assumptions that obscure the relationship between tubulin  
73 biochemistry and observable MT behaviors, so we do not consider them further  
74 here. Biochemical and mechanical models can each recapitulate microtubule  
75 growing and shrinking, and in both kinds of model, catastrophe emerges naturally as  
76 a consequence of GTPase activity.

77 Biochemical models are computationally inexpensive and relatively simple to  
78 interpret because they only contain a small number of adjustable parameters. In  
79 principle, all these parameters represent measurable quantities that could be  
80 accessible to testing/perturbation using site-directed mutagenesis. A limitation of  
81 these biochemical models is that they fail to capture the correct concentration  
82 dependence and other aspects of catastrophe (e.g. (VanBuren *et al.*, 2002; Bowne-  
83 Anderson *et al.*, 2013; Piedra *et al.*, 2016)). The mechanochemical models are  
84 computationally expensive and more complicated to interpret because they are more  
85 parameter intensive. Some of the parameters describing the spring-like properties of  
86  $\alpha\beta$ -tubulin might also be hard to validate experimentally. However, the  
87 mechanochemical models better recapitulate the concentration-dependence and  
88 other aspects of catastrophe where biochemical models fail (Coombes *et al.*, 2013;  
89 Zakharov *et al.*, 2015). Why mechanochemical models better capture the  
90 concentration-dependence of MT catastrophe remains unclear.

91 In both biochemical and mechanochemical models, only two nucleotide states are  
92 used: GTP and GDP. However, recent structural studies (Alushin *et al.*, 2014; Zhang  
93 *et al.*, 2015; Manka and Moores, 2018) have revealed three mutually  
94 incommensurate conformations of  $\alpha\beta$ -tubulin in the body of MT: an ‘expanded’ form  
95 that corresponds to an all-GTP lattice, a ‘compacted’ form that correspond to an all-  
96 GDP lattice, and an intermediate ‘compact-twisted’ form that correspond to an all-  
97 GDP.P<sub>i</sub> lattice. Because each conformation prefers a different lattice geometry, they  
98 must presumably accommodate each other in mixed nucleotide regions of the

99 microtubule lattice. Reconstitution and structural studies of plus-end tracking EB  
100 proteins (Maurer *et al.*, 2011; 2012; 2014; Zhang *et al.*, 2015) support a role for  
101 these conformations in MT dynamics and regulation. Experiments with a slow  
102 shrinking ‘conformation cycle’ mutant of yeast  $\alpha\beta$ -tubulin (Geyer *et al.*, 2015) that in  
103 the GDP state apparently does not relax all the way to the compacted conformation  
104 provided evidence that the  $\alpha\beta$ -tubulin conformation cycle contributes directly to  
105 dictate microtubule shrinking rate and catastrophe frequency. It seemed plausible to  
106 us that not accounting for a GDP.P<sub>i</sub> intermediate, or for the likely modulating  
107 influence of conformational accommodation in a mixed nucleotide state lattice  
108 (Brouhard and Rice, 2018), might explain why biochemical models fail to capture the  
109 concentration-dependence of catastrophe.

110 In the present study, we sought to investigate the consequences of incorporating  
111 various candidates for “missing state/biochemistry” into a computational model, with  
112 the aim of better predicting the concentration-dependence of catastrophe. We  
113 elaborated a Monte Carlo-based algorithm developed in the lab (Ayaz *et al.*, 2014;  
114 Piedra *et al.*, 2016; Mickolajczyk *et al.*, 2018) to test if incorporating a GDP.P<sub>i</sub> state  
115 or long-range coupling (reflecting conformational accommodation) improved  
116 predictions of microtubule catastrophe. We incorporated the GDP.P<sub>i</sub> state and  
117 conformational coupling separately for simplicity and to be able to assess the effect  
118 of each change in isolation. We did not explicitly incorporate ‘mechanochemistry’ into  
119 the model because our goal was to identify minimal additions to biochemical models  
120 that improve their performance with respect to predicting catastrophe.

121 Our simulations revealed that incorporating a GDP.P<sub>i</sub> intermediate state does very  
122 little to improve the predicted concentration dependence of catastrophe frequency.  
123 Long-range through-lattice conformational accommodation, acting to modulate  
124 GTPase rate or dissociation rates, did improve the predictions of catastrophe and its  
125 concentration-dependence. Artificially restricting this modulation to short range  
126 abrogated the previously observed improvement. Thus, it seems that long-range,  
127 through-lattice interactions are important for recapitulating the concentration-

128 dependence of catastrophe in biochemical models. Because mechanochemical  
129 models effectively distribute strain throughout the lattice, long-range coupling may  
130 represent the specific feature that explains why mechanochemical models have  
131 been more successful at predicting catastrophe. By highlighting the importance of  
132 long-range, through-lattice effects, our computational experiments provide a new  
133 way to think about how catastrophe occurs.

## 134 **Results**

### 135 A two-state model for microtubule dynamics fails to capture the weak concentration- 136 dependence of catastrophe frequency

137 We refined our prior algorithm (Ayaz *et al.*, 2014; Piedra *et al.*, 2016; Mickolajczyk *et*  
138 *al.*, 2018) that used kinetic Monte Carlo (Gillespie, 1976; Gibson and Bruck, 2000) to  
139 simulate microtubule dynamics. The algorithm simulates one biochemical event  
140 (dimer association, dissociation, and GTP hydrolysis) at a time and therefore  
141 provides a ‘movie’ of microtubule dynamics. As is commonly done (Chen and Hill,  
142 1985; VanBuren *et al.*, 2002; Molodtsov *et al.*, 2005; Gardner *et al.*, 2011a; Margolin  
143 *et al.*, 2012; Zakharov *et al.*, 2015), our model uses a two-dimensional  
144 representation of the microtubule lattice to track different kinds of binding  
145 environments or neighbor states (Fig. 1A). To minimize the number of adjustable  
146 parameters in the model, we initially adopted a very simple parameterization that  
147 does not explicitly account for different conformations of  $\alpha\beta$ -tubulin (reviewed in  
148 (Brouhard and Rice, 2014)) and that also does not attempt to describe “mechanical”  
149 properties of  $\alpha\beta$ -tubulin and microtubules such as spring-like conformational strain  
150 (reviewed in (Brouhard and Rice, 2018)) (Fig. 1A). The assumptions of this  
151 minimalist parameterization are: (i) there are only two nucleotide states (GTP and  
152 GDP), (ii) nucleotide is ‘trans-acting’ (Fig. 1A), meaning the strength of the  
153 longitudinal interface between dimers (thus the dimer binding affinity at the MT tip) is  
154 determined by the nucleotide located at the interface (Rice *et al.*, 2008; Piedra *et al.*,  
155 2016), (iii) the  $\alpha\beta$ -tubulin dissociation rate for a given subunit determined by the total  
156 sum of free energies of all longitudinal and lateral inter-dimer interactions with other

157 subunits, (iv) the association rate into a given site does not depend on the tip  
158 configuration, and (v) GTP hydrolysis occurs at the inter-dimer interface, meaning  
159 that GTP cannot be hydrolyzed on the most terminal subunit of any protofilament  
160 (Fig 1B). In these kinds of models, catastrophe and rescue occur ‘naturally’ (Fig. 1C)  
161 in a way that depends on the specific parameters used. Our algorithm is constructed  
162 in a highly modular way that makes it easy to implement different biochemical  
163 assumptions (Piedra *et al.*, 2016; Mickolajczyk *et al.*, 2018). Later in the paper, we  
164 relax the minimalistic assumptions of the two state model to test if more complicated  
165 models that incorporate other states or kinds of biochemistry better predict the  
166 concentration dependence of catastrophe.

167 To obtain model parameters that could recapitulate MT elongation and shrinking  
168 rates and approximate the frequency of catastrophe, we followed the divide-and-  
169 conquer approach outlined previously (VanBuren *et al.*, 2002; Piedra *et al.*, 2016).  
170 We trained our model on recent data that reported growth rates, shrinking rates, and  
171 catastrophe frequencies at multiple tubulin concentrations under consistent  
172 conditions (Gardner *et al.*, 2011b; Coombes *et al.*, 2013). First, we used “GTP-only”  
173 simulations to search for parameters that recapitulated MT growth rates over a range  
174 of  $\alpha\beta$ -tubulin concentrations (Fig. 1D). With those parameters fixed, we optimized the  
175 weakening effect of GDP on the longitudinal interface by tuning it to make “all-GDP”  
176 microtubules depolymerize at the observed average rate of post-catastrophe  
177 shrinking (Fig. 1E). With that new parameter also fixed, we refined the GTPase rate  
178 to produce the correct frequency of catastrophe (Fig. 1F). These parameters are not  
179 perfectly independent from each other, so we applied this approach iteratively (see  
180 Methods). For generality, we also trained our model against ‘classic’ measurements  
181 of MT dynamic instability (Walker *et al.*, 1988), where relative to (Gardner *et al.*,  
182 2011b; Coombes *et al.*, 2013) faster shrinking rates and slightly steeper  
183 concentration dependence of catastrophe frequency were observed (Supp. Fig. 1).  
184 As observed in earlier studies, the predicted catastrophe frequency varies much  
185 more strongly with tubulin concentration than observed in experiments (VanBuren *et*

186 *al.*, 2002; Bowne-Anderson *et al.*, 2013; Piedra *et al.*, 2016). Because the model  
187 could not recapitulate the concentration-dependence of catastrophe, we chose 10  
188  $\mu\text{M}$  (the median concentration) as the reference concentration for determining  
189 GTPase rate.

190 Incorporating a GDP- $P_i$  intermediate state into the model does not improve  
191 prediction of the concentration dependence of catastrophe

192 The overly steep concentration dependence of catastrophe predicted by the two-  
193 state model may occur because the model does not account for a state or kind of  
194 interaction that is important for catastrophe. We added a GDP- $P_i$  intermediate  
195 between GTP and GDP to test if a three-state model would better predict the  
196 concentration dependence of catastrophe. We made the following additional  
197 assumptions when implementing the GDP- $P_i$  state (Fig. 2A): (i)  $P_i$  (phosphate)  
198 release from the body of the lattice is a first order process, like GTPase, and (ii) the  
199 phosphate dissociates instantaneously when exposed at the tip. These new  
200 assumptions in the GDP- $P_i$  model require two additional parameters: one that  
201 describes the strength of a longitudinal contact when GDP- $P_i$  is at the interface, and  
202 the other that describes the rate of  $P_i$  release (Fig. 2A).

203 We first examined how varying the strength of longitudinal contacts at the GDP- $P_i$   
204 interface affects the predicted frequency of catastrophe as a function of  $\alpha\beta$ -tubulin  
205 concentration. We varied the strength of the GDP- $P_i$  interface from strong  
206 (equivalent to GTP interface), to intermediate (halfway between GTP and GDP  
207 interface), to weak (equivalent to GDP interface), keeping the ratio of the hydrolysis  
208 and the release rate constant. Note that setting the strength of the GDP- $P_i$  interface  
209 to be identical to the GDP interface yields a model that is functionally identical to the  
210 two-state model. Whether GTP-like, GDP-like, or in between, the strength of the  
211 GDP- $P_i$  interface has little effect on predicted growth rates (Fig. 2B). However, and  
212 as expected, increasing the strength of GDP- $P_i$  interface reduces the catastrophe  
213 frequency because it effectively reduces the rate of subunit dissociation from the  
214 microtubule end. For a consistent comparison of the concentration dependence of



215 the catastrophe frequency, we retrained the GTPase rate to match the catastrophe  
216 frequency at the reference concentration ( $10 \mu\text{M}$ ) for the strong and intermediate  
217 strength GDP. $P_i$  interface (while keeping the  $P_i$  release rates identical to the new  
218 GTPase rates, as stated above). The GTPase rate must be increased to  
219 compensate for decreased catastrophe frequency (Supp. Table 1A). The newly  
220 trained GTPase rates and the strength of the GDP- $P_i$  interface, whether GTP-like,  
221 GDP-like, or in between, had little effect on the predicted growth rates (Fig. 2B).  
222 Keeping the ratio of hydrolysis rate and the release rate same, the predicted  
223 concentration dependence of catastrophe frequency does not substantially improve  
224 (Fig. 2C).

225 We then used a grid search approach to explore how changing the ratio between the  
226 GTPase rate and the phosphate release rates affects the concentration dependence  
227 of catastrophe. We fixed the rate of phosphate release to be 10 times faster or  
228 slower than the rate of GTPase and varied the strength of the GDP. $P_i$  interface (with  
229 re-training of the GTPase rate as described above) as before. In both cases, these  
230 changes exacerbated the problems with the model: the predicted concentration-  
231 dependence of catastrophe frequency actually increased (Fig. 2D). We observed  
232 similar trends in fits to the other dataset that we trained our model against (Walker *et*  
233 *al.*, 1988) (Supp. Fig. 1A). The predicted concentration-dependence of catastrophe  
234 was at its lowest when the GTPase rate and the phosphate release rate were the  
235 same and when the strength of the GDP. $P_i$  interface was as strong as the interface  
236 with GTP. However, adding a GDP. $P_i$  state did not substantially improve prediction  
237 of the concentration-dependence catastrophe.

238 Nearest-neighbor conformational accommodation improves predictions of the  
239 concentration dependence of catastrophe when modulating GTPase, but not  $\alpha\beta$ -  
240 tubulin dissociation

241 The expanded conformation (seen in the all GTP lattice) and the compacted  
242 conformation (seen in the all GDP lattice) make lattices with different spacing of the  
243 lateral interfaces and other changes (Alushin *et al.*, 2014; Zhang *et al.*, 2015; Manka



244 and Moores, 2018). How  $\alpha\beta$ -tubulins accommodate incommensurate GTP- and  
245 GDP-bound conformations in a mixed nucleotide state lattice, as must occur near  
246 the tip of the growing MT, is not understood (reviewed in (Brouhard and Rice,  
247 2018)). We speculated that the conformational mismatch might modulate the  
248 strength of lateral interactions between  $\alpha\beta$ -tubulins in different nucleotide states, or  
249 that it might modulate the rate of GTPase activity. We implemented these two ideas  
250 separately in to the model to test if nearest-neighbor conformational accommodation  
251 operating between neighboring  $\alpha\beta$ -tubulins could improve the predicted  
252 concentration-dependence of catastrophe.

253 To implement neighbor-based modulation of lateral interactions, we assumed that  
254 the conformational mismatch/accommodation increases the dissociation rate. In  
255 other words,  $\alpha\beta$ -tubulin with a lateral neighbor that is in a different nucleotide state  
256 (and hence conformation) dissociates more quickly than it would otherwise (Fig. 3A).  
257 Due to these changes, the ‘nearest-neighbor affinity modulation’ model has only one  
258 additional parameter: the fold-faster dissociation rate for  $\alpha\beta$ -tubulin with a lateral  
259 nearest-neighbor with differing nucleotide state. To examine how varying this  
260 parameter affects the concentration dependence of catastrophe frequency in  
261 simulations, we set the  $\alpha\beta$ -tubulin with lateral neighbor with different nucleotide to  
262 dissociate faster by factors of 1, 1.6 2.7, and 7.8 (these values correspond to free-  
263 energy changes of 0, 0.5, 1, and 2  $k_B T$ , respectively). When the fold increase in  
264 dissociation rate is 1, this model behaves identically to the 2-state model. The  
265 maximum parameter value of 7.8 is smaller than the GDP weakening factor of 34 for  
266 this data set. Further increases in the modulation factor did not lead to substantial  
267 reduction in concentration dependence of the predicted catastrophe frequency. We  
268 observed similar trends in fits to the other dataset we trained out model against  
269 (Walker *et al.*, 1988) (Supp. Fig. 2A). The new parameter only modestly affected the  
270 predicted growth rates (Fig. 3B), but at higher values it substantially increased  
271 catastrophe frequency. This makes sense, because the exposure of a small number  
272 of terminal GDP-bound tubulin can lead to a catastrophe. The GTPase was

273 determined by training the models to the catastrophe frequency at the reference  
274 concentration (10  $\mu$ M), as described above (see also Supp. Table 1B). Compared to  
275 the 2-state model, the range of predicted catastrophe frequency over the  
276 concentration range decreased from 185-fold to 45-fold (Fig. 3C). Thus, this simple  
277 attempt at allowing inter-dimer interaction to be modulated by neighboring nucleotide  
278 state somewhat improves the predicted concentration dependence of catastrophe  
279 frequency.

280 To implement neighbor-based modulation of GTPase activity, we assumed that  $\alpha\beta$ -  
281 tubulin with GTP next to  $\alpha\beta$ -tubulin bound to GDP hydrolyzes GTP more quickly (Fig.  
282 4A). In essence, this assumption is equivalent to saying that the ‘accommodating’,  
283 intermediate conformation is actually the most active GTPase. This ‘nearest-  
284 neighbor GTPase modulation model’ has one additional parameter: the fold increase  
285 in hydrolysis rate. We set this neighbor dependent GTPase modulation to increase  
286 the rate by factors of 1, 10, 100, and 1000. When the fold increase in hydrolysis rate  
287 is 1, the GTPase hydrolysis model is functionally identical to the two-state model.  
288 The new parameter did not substantially affect predicted growth rates (Fig. 4B). As  
289 before, we adjusted the basal GTPase rate to maintain the correct catastrophe  
290 frequency at the reference concentration (Supp. Table 1B). Compared to the two-  
291 state model, the range of predicted catastrophe frequency over the concentration  
292 range decreased from 185-fold to 7.5-fold. This represents a substantial  
293 improvement in the predicted concentration dependence of catastrophe (Fig. 4C).  
294 We observed similar trends in fits to the other dataset we trained our model against  
295 (Walker *et al.*, 1988) (Supp. Fig. 3A).

296 Why did this nearest-neighbor GTPase modulation model improve predictions of the  
297 concentration dependence of catastrophe so much more dramatically? Looking at  
298 the biochemical “movies” generated by the simulation, and even though we  
299 implemented this as a nearest-neighbor modulation, we observed that the GTP  
300 hydrolysis propagated through the lattice, like a wave (not shown). The wave of GTP  
301 hydrolysis starts from a random GTP hydrolysis in locally all-GTP lattice, where

302 hydrolysis is relatively slow in this model. Hydrolysis of one GTP to GDP effectively  
303 starts a chain reaction because the nearest neighbor  $\alpha\beta$ -tubulins have increased  
304 GTPase activity. GTP hydrolysis at this second site then primes its neighbor for  
305 increased GTPase activity, and so on. Thus, although we constructed the model to  
306 have only nearest neighbor effects, the resulting behavior showed longer-range  
307 propagation.

308 Was it the local change in GTPase rate or the longer-range propagation of GTP  
309 hydrolysis that was most important for improving the predicted concentration-  
310 dependence of catastrophe? To examine this question, we modified the nearest-  
311 neighbor GTPase modulation model so that the wave of GTP hydrolysis would be  
312 artificially prevented from propagating too far. To accomplish this, we disallowed  
313 “across-seam” interactions from modulating GTPase activity. As before, we set the  
314 neighbor dependent GTPase modulation to increase by factors of 1, 10, 100, and  
315 1000, and retrained the basal GTPase rate to match the catastrophe frequency at  
316 the reference concentration. Limiting the propagation of (“truncating”) the nearest-  
317 neighbor stimulation of GTPase degraded the model’s ability to predict the  
318 concentration-dependence of catastrophe. Indeed, whereas at low GTPase  
319 modulation factors we observed a modest improvement in the predicted  
320 concentration-dependence of catastrophe, at higher modulation factors this trend  
321 reversed (Fig. 4E). Whereas the untruncated model showed only a 7.5-fold change  
322 in catastrophe frequency over the measured concentration range, the truncated  
323 version showed a 110-fold change, nearly reverting back to 185-fold change  
324 observed in the two-state model. We observed similar trends in fits to the other  
325 dataset we trained our model against (Walker *et al.*, 1988), but the magnitude of the  
326 difference was much smaller than in the models trained to the data from (Gardner *et al.*,  
327 2011b; Coombes *et al.*, 2013) (Supp. Fig. 3B). In summary, nearest-neighbor  
328 modulation of  $\alpha\beta$ -tubulin dissociation rate had limited effect on the predicted  
329 concentration dependence of catastrophe. By contrast, nearest-neighbor modulation  
330 of GTPase activity yielded a substantial improvement. The activation of GTPase

331 propagated through the lattice, and we showed that this long-range propagation was  
332 required for improved predictions of catastrophe.

333 Incorporating long-range through lattice modulation of the strength of tubulin-tubulin  
334 interactions can also improve predictions of catastrophe

335 In the nearest-neighbor GTPase modulation model, the wave-like propagation of  
336 GTP hydrolysis effectively allowed the nucleotide state at one site to indirectly affect  
337 the biochemistry of distant (beyond nearest-neighbor)  $\alpha\beta$ -tubulins. We wondered if  
338 incorporating long-range through-lattice modulation of  $\alpha\beta$ -tubulin: $\alpha\beta$ -tubulin binding  
339 affinity could also improve the predicted concentration dependence of catastrophe.

340 Previously, in the nearest-neighbor affinity modulation model, for simplicity we  
341 assumed that the destabilizing inter-dimer interaction was limited to nearest  
342 neighbors. However, it stands to reason that if one subunit influences the  
343 conformation of its neighbor, then that neighbor should influence the conformation of  
344 its neighbor, and so on. In other words, the conformational accommodation should  
345 propagate beyond nearest neighbor contacts. We implemented a version of this  
346 model wherein the accommodation modulates the strength of lattice contacts over  
347 some specified distance (number of  $\alpha\beta$ -tubulin subunits), by modifying the affinity  
348 model so that the nucleotide state of the tubulins affects the dissociation rate of other  
349 tubulins further away. This time, we kept the modulated dissociation rate to 7.4, the  
350 highest value tried for the original nearest-neighbor affinity modulation model. Then  
351 we varied the maximum range of modulation (Fig. 5A). When the range is set to 0,  
352 the model is identical to the two-state model, while if the range is set to 1, the model  
353 is identical to the original nearest-neighbor affinity model. When the range is an  
354 integer greater than one, it means a given subunit affects that many of its neighbors  
355 to the left and to the right. Then, we retrained the GTPase rate to match the  
356 catastrophe frequency at the reference concentration. As we increased the  
357 maximum range of through-lattice modulation of inter-dimer interaction, the predicted  
358 catastrophe frequency became substantially less sensitive to  $\alpha\beta$ -tubulin  
359 concentration (Fig. 5C). Compared to the nearest neighbor model, allowing long-

360 range effects yielded an additional ~4.5-fold decrease in the range of catastrophe  
361 frequencies over the concentration range. We observed similar trends in fits to the  
362 other dataset we trained our model against (Walker *et al.*, 1988) (Supp. Fig. 2B).

363 In summary, incorporating long-range, through-lattice modulation of tubulin-tubulin  
364 interactions improved predictions of the concentration-dependence of catastrophe.  
365 Short-range modulation was much less effective. Incorporating a ‘third state’ in the  
366 form of GDP.P<sub>i</sub> also did not improve predictions of the concentration-dependence of  
367 catastrophe. Thus, it appears that long-range through-lattice effects, whether  
368 modulating GTPase or  $\alpha\beta$ -tubulin dissociation, represent a missing ingredient  
369 required for biochemical models to recapitulate the concentration-dependence of  
370 catastrophe.

371 An empirical decomposition of catastrophe frequency reveals differences in  
372 frequency of pausing and commitment to catastrophe between the models

373 To better understand why incorporating through-lattice long-range modulation  
374 improved predictions of the concentration dependence of catastrophe, we took a  
375 closer look at the sequence of events that led to catastrophe in our different models.  
376 In all models, MT growth always paused (defined as a transient growth rate less  
377 than 25% of the average MT elongation rate) for a short time before undergoing a  
378 catastrophe (Fig. 6A). Similar pausing/slowdown has been observed in experiments  
379 (Maurer *et al.*, 2014). As we showed previously (Piedra *et al.*, 2016), terminal GDP  
380 exposure can cause this slowing of elongation by transiently poisoning individual  
381 protofilaments. This transient pausing in turn accelerates erosion of the stabilizing  
382 cap, and the consequent complete loss of the cap leads to catastrophe. However,  
383 not all pausing episodes led to a catastrophe in our simulations. If the GDP exposure  
384 can be overcome before the stabilizing cap completely erodes, the MT can resume  
385 growing at a normal rate. If the transient pausing is truly an obligate intermediate  
386 step between growth and catastrophe, then the product of “growth-to-pause”  
387 frequency and “pause-to-catastrophe” probability (not frequency because this is just  
388 a score of how catastrophe occurs as a result of transient pausing) should yield the

389 catastrophe frequency (see Methods) (Fig. 6B). We quantified the “growth-to-pause”  
390 frequency and the “pause-to-catastrophe” probability from simulation outputs of the  
391 2-state model; their product faithfully reproduced the frequency of catastrophe (Fig.  
392 6C). Thus, transient pausing is necessary but not sufficient for catastrophe, and we  
393 can decompose catastrophe into two separate steps.

394 If the catastrophe frequency is the product of the growth-to-pause frequency and the  
395 pause-to-catastrophe probability, then the concentration dependence of the  
396 catastrophe frequency must also stem from the concentration dependence of its  
397 components. To determine if the concentration dependence can be attributed to the  
398 growth-to-pause frequency, the pause-to-catastrophe probability, or both, we first  
399 measured the growth-to-pause frequency and the pause-to-catastrophe probability  
400 as functions of tubulin concentration in the two-state model. Both the growth-to-  
401 pause frequency and the pause-to-catastrophe probability depended strongly on  $\alpha\beta$ -  
402 tubulin concentration (Fig. 6C).

403 We then examined how different models affected the concentration dependencies of  
404 growth-to-pause frequencies and pause-to-catastrophe probabilities relative to the  
405 baseline provided by the two-state model (Fig. 6D). Compared to the two-state  
406 model, all models showed substantial changes to the concentration dependence of  
407 growth-to-pause frequency and pause-to-catastrophe probability. In the models that  
408 did not allow long-range effects, the concentration-dependence of the two  
409 components of catastrophe moved in opposite directions, effectively cancelling each  
410 other so that there was little improvement in the concentration-dependence of the  
411 catastrophe. By contrast, in the models that allowed long-range effects, the  
412 concentration-dependence of the two components of catastrophe moved in concert  
413 with each other, explaining why these long-range models better predicted  
414 catastrophe.

## 415 Discussion

416 Simple two-state biochemical models fail to predict the weak concentration-  
417 dependence of the catastrophe frequency. The studies described here were  
418 motivated by the hypothesis that this failure occurs because two-state models  
419 oversimplify the biochemistry, and that we might be able to gain insight into what  
420 was missing using modeling. We sought to test whether adding different candidates  
421 for missing states or kinds of interactions to a biochemical model for microtubule  
422 dynamics could improve predictions about catastrophe. The new kinds of  
423 biochemistry we tested were inspired by recent structural experiments (Alushin *et al.*,  
424 2014; Zhang *et al.*, 2015; Manka and Moores, 2018) that revealed three distinct and  
425 apparently mutually incommensurate conformations of  $\alpha\beta$ -tubulin in the GTP,  
426 GDP.P<sub>i</sub>, and GDP-bound microtubule lattice. These structural findings, along with  
427 results from reconstitution studies of EB proteins (Maurer *et al.*, 2011; 2014), imply  
428 that the models might need to contain a third state (GDP.P<sub>i</sub>), or they might need to  
429 account for the likely effects of incommensurate conformations  $\alpha\beta$ -tubulin by  
430 modulating the properties of GTP- or GDP-tubulin in a context-dependent way  
431 (conformational coupling). A third state and conformational coupling might  
432 simultaneously be required, but for simplicity in this work we chose to examine the  
433 third state and conformational coupling models separately.

434 Adding a third state did little if anything to improve predictions of catastrophe. By  
435 contrast, allowing conformational coupling to modulate either the GTPase rate or the  
436 lattice-binding affinity of terminal subunits noticeably improved predictions of the  
437 concentration-dependence of catastrophe. Because this conformational coupling  
438 should propagate beyond nearest-neighbor interactions, our computational findings  
439 suggest that through-lattice cooperative effects are important determinants of  
440 microtubule catastrophe. None of the models we examined fully capture the  
441 concentration-dependence of microtubule catastrophe measured in experiments.  
442 This should not be surprising, because we intentionally chose the simplest (least  
443 parameter intensive) ways to examine the possible consequences of candidate



444 'missing biochemistries' like a GDP.P<sub>i</sub> state or the coupling that arises from  
445 conformational accommodation.

446 Mechanochemical models have outperformed biochemical models where  
447 catastrophe is concerned: mechanochemical models better recapitulate both the  
448 concentration- and age-dependence of microtubule catastrophe (Coombes *et al.*,  
449 2013; Zakharov *et al.*, 2015). The mechanochemical models are more parameter  
450 intensive, however, and they account for multiple features that the biochemical  
451 models do not: curved-straight conformational changes on the microtubule end,  
452 long-range energetic coupling in the lattice, longitudinal inter-dimer twist, and more.  
453 Consequently, precisely why these mechanochemical models better predict the  
454 concentration dependence of catastrophe compared to biochemical models has so  
455 far not been clear. The work described here may provide insight into why  
456 mechanochemical models have been more successful at predicting catastrophe.  
457 Indeed, our simulations indicate that long-range, through-lattice coupling is required  
458 for improved predictions of catastrophe in biochemical models. Because of the way  
459 that they allow mechanical strain to be distributed through the lattice, a kind of long-  
460 range coupling is included in mechanochemical models. In light of our results, it  
461 seems likely that the success of mechanochemical models can be attributed to the  
462 fact that they incorporate long-range coupling in the lattice.

463 What we have described based on our modeling is a kind of cooperativity that  
464 operates within the microtubule. This resonates with a view of microtubule dynamics  
465 (Kueh and Mitchison, 2009) (Brouhard and Rice, 2018) in which different  
466 conformations of  $\alpha\beta$ -tubulin can modulate or even override nucleotide state in  
467 dictating biochemical interactions and rates in the lattice. Detecting such  
468 cooperativity experimentally and determining whether it operates on GTPase or the  
469 strength of lattice contacts are important challenges for future work. The recently  
470 introduced ability to work with tubulins from different species (Widlund *et al.*, 2012;  
471 Chaaban *et al.*, 2018) (Drummond *et al.*, 2011), to purify single isotypes and site-  
472 directed mutants (Johnson *et al.*, 2011; Minoura *et al.*, 2013; Geyer *et al.*, 2015;

473 Pamula *et al.*, 2016; Ti *et al.*, 2016; Vemu *et al.*, 2016; 2017; Geyer *et al.*, 2018)  
474 (Drummond *et al.*, 2011), and to measure  $\alpha\beta$ -tubulin : microtubule interactions at the  
475 single molecule level (Mickolajczyk *et al.*, 2018) have the potential to accomplish  
476 this, and promise to provide new kinds of data that will drive a deeper understanding  
477 of microtubule catastrophe.

478 In summary, our computational experiments demonstrate that beyond-nearest-  
479 neighbor, through-lattice effects can make important contributions to microtubule  
480 catastrophe. The combination of this allosteric conformational coupling with the  
481 extended microtubule lattice has the potential to generate abrupt, switch-like  
482 changes (reviewed in (Bray, 2013) for other systems) that could give rise to  
483 threshold-type behaviors wherein the switch only happens upon reaching some  
484 critical percentage of GTP-hydrolysis (or some other property). Interestingly, the  
485 onset of rapid shrinking has been observed to occur after exceeding a threshold loss  
486 of the stabilizing cap (Maurer *et al.*, 2014). A number of microtubule-associated  
487 proteins have recently been shown to alter the microtubule lattice upon binding  
488 (Zhang *et al.*, 2015; Shima *et al.*, 2018) (Zhang *et al.*, 2017) (Howes *et al.*, 2017)  
489 (Loeffelholz *et al.*, 2017; Peet *et al.*, 2018; Zhang *et al.*, 2018), and these binding-  
490 induced conformational changes might also modulate properties of the lattice at  
491 greater distance. At least one study has proposed that EB proteins might influence  
492 the activity of XMAP215-family microtubule polymerases via long-range, through-  
493 lattice effects (Zanic *et al.*, 2013), but the underlying mechanism was not specified.  
494 The apparent importance of long-range cooperative/allosteric effects suggests that  
495 material-like properties of the microtubule are important for catastrophe and may be  
496 targeted by regulatory factors.

497

## 498 **Acknowledgements**

499 We thank B. Geyer, S. Majumdar, E. Bonventre, and X. Ye for critical comments on  
500 the manuscript. LMR is the Thomas O Hicks Scholar in Medical Research. This work

501 was supported by a grant from the NSF to LMR (MCB-1615938). TK received  
502 support from NIH T32 GM008297.

503

## 504 **Methods**

### 505 Computational simulation of the models

506 We created a computer program (coded in fortran) to perform kinetic Monte Carlo  
507 simulations of MT plus ends. The model is similar to one we used previously (Ayaz  
508 *et al.*, 2014; Piedra *et al.*, 2016; Mickolajczyk *et al.*, 2018), and was inspired by an  
509 earlier implementation from others (VanBuren *et al.*, 2002). Briefly, the microtubule  
510 lattice is represented by a two dimensional array with a periodic boundary condition  
511 to mimic the cylindrical wall of the microtubule. MT dynamics is simulated one  
512 biochemical reaction ( $\alpha\beta$ -tubulin subunit association or dissociation, and GTP  
513 hydrolysis) at a time. In a prior study we reported that the rate of GDP to GTP  
514 exchange on the microtubule end could modulate the frequency of catastrophe  
515 (Piedra *et al.*, 2016). That reaction did not improve the predicted concentration-  
516 dependence of catastrophe (Piedra *et al.*, 2016), so for simplicity we did not include  
517 it in the models described here. For the two-state model, the association can happen  
518 at the tip of each protofilament, and association rate is given by  $k_{on} \times [\alpha\beta\text{-tubulin}]$ ,  
519 where  $k_{on}$  denotes the on rate constant. The terminal subunits can dissociate from  
520 the MT lattice at a rate given by  $k_{on} \times K_D$ , where  $K_D$  is the affinity determined by the  
521 sum of all inter-dimer interactions. As described previously (Piedra *et al.*, 2016), our  
522 parameterization assumes that the nucleotide (GTP or GDP) acts in-trans to affect  
523 the strength of longitudinal contacts such that GTP contacts are stronger than GDP  
524 ones. GTP hydrolysis is modeled for all nonterminal subunits with rate constant  $k_{hyd}$ .

### 525 Automated analysis of simulations

526 We created custom MATLAB routines to analyze the output from the simulations.  
527 These routines determine the instantaneous growth / shrinking rates by looking at  
528 the change in the total number of subunits over a 5 second time period. If the

529 instantaneous growth rate falls below 25% of the average growth rate during the  
530 growth phase, the simulated MTs are considered to have paused for the duration of  
531 the slower growth. The pause episodes are left out of the growth / shrinking rate  
532 calculations and are used to determine how frequently the simulation pauses. The  
533 MATLAB routine automatically detects MT catastrophe using the following definition:  
534 the simulated MT persistently must be shrinking at a rapid rate (shrinking rate  
535 greater than 75% of the mode of shrinking rate distribution) for an extended period of  
536 time (at least 15 seconds). In the two-step decomposition of catastrophe, the  
537 frequency of pausing is tabulated to obtain the ‘growth to pause’ frequency, and the  
538 likelihood of catastrophe following transient pausing gives the “pause-to-catastrophe”  
539 probability. We used the ratios between values at 12  $\mu\text{M}$  and 9  $\mu\text{M}$  as a  
540 measurement of the concentration dependencies of the “growth-to-pause” frequency  
541 and the “pause-to-catastrophe” probability. These ratios (the concentration  
542 dependencies) were normalized to the concentration dependencies of the two-state  
543 models for model to model comparisons.

#### 544 The parametrization of two-state computational model

545 To parametrize the two-state model, we first assumed a value for  $k_{\text{on}}$  ( $1.5 \text{ tubulin} \cdot \text{s}^{-1} \cdot \mu\text{M}^{-1}$   
546 per protofilament for the data that we fit in the main text (Gardner *et al.*,  
547 2011b; Coombes *et al.*, 2013) and  $2 \text{ tubulin} \cdot \text{s}^{-1} \cdot \mu\text{M}^{-1}$  per protofilament for the  
548 alternative data that we fit in the supplemental material (Walker *et al.*, 1988)). Then,  
549 the strengths of the longitudinal (at the GTP-interface) and lateral interaction were  
550 determined by fitting the model predictions on growth rates (during the growing  
551 phase) to the experimental values. The strength of the longitudinal interaction at the  
552 GDP-interface was determined by fitting the model predictions on shrinking rates  
553 (during the shrinking phase) to the experimental values. Then the GTPase rate is  
554 determined by fitting the model predictions on the catastrophe frequency at a single  
555 reference concentration (10  $\mu\text{M}$  for the data (Gardner *et al.*, 2011b; Coombes *et al.*,  
556 2013) in the main text and 12  $\mu\text{M}$  for the alternative set (Walker *et al.*, 1988) in

557 supplemental material ). This process is repeated until all adjustable parameters  
558 stabilize.

### 559 The GDP.P<sub>i</sub> model

560 We incorporated a third intermediate state into our model, by including GDP.P<sub>i</sub>. This  
561 'GDP.P<sub>i</sub> model' inherits the two-state model's properties described above with some  
562 modifications. In this model, GTP is first hydrolyzed to GDP.P<sub>i</sub> then the P<sub>i</sub> released at  
563 a set rate to form GDP. We assumed that the P<sub>i</sub> is released immediately when  
564 exposed at the tip of the MT, and that the strength of the longitudinal interface with  
565 GDP.P<sub>i</sub> is different from the ones with GTP or GDP. This model has two additional  
566 parameters: the rate of P<sub>i</sub> release and the strength of the longitudinal interface with  
567 GDP.P<sub>i</sub>. We explored the parameter space of the additional adjustable parameters in  
568 a 3-by-3 grid pattern: setting the rate of P<sub>i</sub> release 0.1, 1, 10-fold of the GTPase rate,  
569 and setting the strength of the longitudinal interface with GDP.P<sub>i</sub> to strong (GTP-like),  
570 intermediate, and weak (GDP-like). Then, in order to maintain the correct frequency  
571 of catastrophe at the reference concentration, we retrained the GTPase rate. We  
572 kept the kept the  $\alpha\beta$ -tubulin binding affinities the same as in the two-state model  
573 because we did not want to introduce confounding variation. Changes in growth and  
574 shrinking rates due to the modification were negligible.

### 575 The affinity modulation models

576 As before, the affinity modulation models inherit the two-state model's properties  
577 described above with some modifications. In the nearest-neighbor affinity modulation  
578 model, we assumed that the rate of  $\alpha\beta$ -tubulin dissociation is faster if the nucleotide  
579 state of the longitudinal interface of the nearest neighbor is different. This model has  
580 one new adjustable parameter: the energy cost of being next to a tubulin with  
581 different nucleotide. We explored the parameter space by setting the energy cost to  
582 different values and retraining the GTPase. As described above, we maintained the  
583  $\alpha\beta$ -tubulin binding affinities the same as in the two-state model. In the long-range  
584 affinity modulation model, the range of influence for the affinity modulation is an

585 additional adjustable parameter. When the range is set to 0, the model behaves  
586 identically as the two-state model, and when the range is set to 1, the model  
587 behaves identically as the nearest-neighbor affinity modulation model; for values  
588 larger than 1 it gives beyond-nearest-neighbor effects. For this model, we set the  
589 energy cost to the maximum value we used for the nearest-neighbor affinity  
590 modulation model and varied the range from 0 to 4.

#### 591 The GTPase modulation models

592 In the nearest-neighbor GTPase modulation model the  $\alpha\beta$ -tubulin with GTP laterally  
593 next to  $\alpha\beta$ -tubulin bound to GDP hydrolyzes GTP faster. This model has one  
594 additional parameter: the context-dependent fold-increase in GTPase rate. We set  
595 the fold increase to 1, 10, 100, and 1000, and retrained the basal GTPase rate, as  
596 before. This context-dependent increase in GTPase rate leads to a wave-like  
597 propagation of GTP hydrolysis. In the propagation-limited GTPase modulation  
598 model, we limited the wave-like propagation of the GTP hydrolysis by preventing  
599 GTPase modulation across the MT seam.

600

#### 601 **References**

- 602 Alushin, G. M., Lander, G. C., Kellogg, E. H., Zhang, R., Baker, D., and Nogales, E.  
603 (2014). High-Resolution Microtubule Structures Reveal the Structural Transitions in  $\alpha\beta$ -  
604 Tubulin upon GTP Hydrolysis. *Cell* *157*, 1117–1129.
- 605 Ayaz, P., Munyoki, S., Geyer, E. A., Piedra, F.-A., Vu, E. S., Bromberg, R., Otwinowski,  
606 Z., Grishin, N. V., Brautigam, C. A., and Rice, L. M. (2014). A tethered delivery  
607 mechanism explains the catalytic action of a microtubule polymerase. *Elife* *3*, e03069.
- 608 Bayley, P. M., Schilstra, M. J., and Martin, S. R. (1989). A simple formulation of  
609 microtubule dynamics: quantitative implications of the dynamic instability of microtubule  
610 populations in vivo and in vitro. *J. Cell. Sci.* *93 ( Pt 2)*, 241–254.
- 611 Bayley, P. M., Schilstra, M. J., and Martin, S. R. (1990). Microtubule dynamic instability:  
612 numerical simulation of microtubule transition properties using a Lateral Cap model. *J.*  
613 *Cell. Sci.* *95 ( Pt 1)*, 33–48.
- 614 Bowne-Anderson, H., Zanic, M., Kauer, M., and Howard, J. (2013). Microtubule dynamic  
615 instability: a new model with coupled GTP hydrolysis and multistep catastrophe.

- 616 Bioessays *35*, 452–461.
- 617 Bray, D. (2013). The propagation of allosteric states in large multiprotein complexes. *J.*  
618 *Mol. Biol.* *425*, 1410–1414.
- 619 Brouhard, G. J. (2015). Dynamic instability 30 years later: complexities in microtubule  
620 growth and catastrophe. *Mol. Biol. Cell* *26*, 1207–1210.
- 621 Brouhard, G. J., and Rice, L. M. (2014). The contribution of  $\alpha\beta$ -tubulin curvature to  
622 microtubule dynamics. *J. Cell Biol.* *207*, 323–334.
- 623 Brouhard, G. J., and Rice, L. M. (2018). Microtubule dynamics: an interplay of  
624 biochemistry and mechanics. *Nat. Rev. Mol. Cell Biol.* *19*, 451–463.
- 625 Brun, L., Rupp, B., Ward, J. J., and Nédélec, F. (2009). A theory of microtubule  
626 catastrophes and their regulation. *Proc. Natl. Acad. Sci. U.S.a.* *106*, 21173–21178.
- 627 Chaaban, S., Jariwala, S., Hsu, C.-T., Redemann, S., Kollman, J. M., Müller-Reichert,  
628 T., Sept, D., Bui, K. H., and Brouhard, G. J. (2018). The Structure and Dynamics of  
629 *C. elegans* Tubulin Reveals the Mechanistic Basis of Microtubule Growth. *Dev. Cell.*
- 630 Chen, Y. D., and Hill, T. L. (1985). Monte Carlo study of the GTP cap in a five-start helix  
631 model of a microtubule. *Proc. Natl. Acad. Sci. U.S.a.* *82*, 1131–1135.
- 632 Chen, Y., and Hill, T. L. (1983). Use of Monte Carlo calculations in the study of  
633 microtubule subunit kinetics. *Proc. Natl. Acad. Sci. U.S.a.* *80*, 7520–7523.
- 634 Coombes, C. E., Yamamoto, A., Kenzie, M. R., Odde, D. J., and Gardner, M. K. (2013).  
635 Evolving tip structures can explain age-dependent microtubule catastrophe. *Curr. Biol.*  
636 *23*, 1342–1348.
- 637 Desai, A., and Mitchison, T. J. (1997). Microtubule polymerization dynamics. *Annu. Rev.*  
638 *Cell Dev. Biol.* *13*, 83–117.
- 639 Drummond, D. R., Kain, S., Newcombe, A., Hoey, C., Katsuki, M., and Cross, R. A.  
640 (2011). Purification of tubulin from the fission yeast *Schizosaccharomyces pombe*.  
641 *Methods Mol. Biol.* *777*, 29–55.
- 642 Duellberg, C., Cade, N. I., and Surrey, T. (2016). Microtubule aging probed by  
643 microfluidics-assisted tubulin washout. *Mol. Biol. Cell* *27*, 3563–3573.
- 644 Flyvbjerg, H., Holy, T., and Leibler, S. (1994). Stochastic dynamics of microtubules: A  
645 model for caps and catastrophes. *Phys. Rev. Lett.* *73*, 2372–2375.
- 646 Gardner, M. K., Charlebois, B. D., Jánosi, I. M., Howard, J., Hunt, A. J., and Odde, D. J.  
647 (2011a). Rapid microtubule self-assembly kinetics. *Cell* *146*, 582–592.



- 648 Gardner, M. K., Zanic, M., Gell, C., Bormuth, V., and Howard, J. (2011b).  
649 Depolymerizing kinesins Kip3 and MCAK shape cellular microtubule architecture by  
650 differential control of catastrophe. *Cell* *147*, 1092–1103.
- 651 Geyer, E. A., Burns, A., Lalonde, B. A., Ye, X., Piedra, F.-A., Huffaker, T. C., and Rice,  
652 L. M. (2015). A mutation uncouples the tubulin conformational and GTPase cycles,  
653 revealing allosteric control of microtubule dynamics. *Elife* *4*, 3389.
- 654 Geyer, E. A., Miller, M. P., Brautigam, C. A., Biggins, S., and Rice, L. M. (2018). Design  
655 principles of a microtubule polymerase. *Elife* *7*, 604.
- 656 Gibson, M. A., and Bruck, J. (2000). Efficient Exact Stochastic Simulation of Chemical  
657 Systems with Many Species and Many Channels, American Chemical Society.
- 658 Gillespie, D. T. (1976). A general method for numerically simulating the stochastic time  
659 evolution of coupled chemical reactions. *Journal of Computational Physics* *22*, 403–434.
- 660 Howes, S. C., Geyer, E. A., LaFrance, B., Zhang, R., Kellogg, E. H., Westermann, S.,  
661 Rice, L. M., and Nogales, E. (2017). Structural differences between yeast and  
662 mammalian microtubules revealed by cryo-EM. *J. Cell Biol.* *216*, 2669–2677.
- 663 Johnson, V., Ayaz, P., Huddleston, P., and Rice, L. M. (2011). Design, overexpression,  
664 and purification of polymerization-blocked yeast  $\alpha\beta$ -tubulin mutants. *Biochemistry* *50*,  
665 8636–8644.
- 666 Kueh, H. Y., and Mitchison, T. J. (2009). Structural plasticity in actin and tubulin polymer  
667 dynamics. *Science* *325*, 960–963.
- 668 Loeffelholz, von, O., Venables, N. A., Drummond, D. R., Katsuki, M., Cross, R., and  
669 Moores, C. A. (2017). Nucleotide- and Mal3-dependent changes in fission yeast  
670 microtubules suggest a structural plasticity view of dynamics. *Nat Commun* *8*, 2110.
- 671 Manka, S. W., and Moores, C. A. (2018). The role of tubulin-tubulin lattice contacts in  
672 the mechanism of microtubule dynamic instability. *Nat. Struct. Mol. Biol.* *25*, 607–615.
- 673 Margolin, G., Gregoret, I. V., Cickovski, T. M., Li, C., Shi, W., Alber, M. S., and  
674 Goodson, H. V. (2012). The mechanisms of microtubule catastrophe and rescue:  
675 implications from analysis of a dimer-scale computational model. *Mol. Biol. Cell* *23*,  
676 642–656.
- 677 Martin, S. R., Schilstra, M. J., and Bayley, P. M. (1993). Dynamic instability of  
678 microtubules: Monte Carlo simulation and application to different types of microtubule  
679 lattice. *Biophys. J.* *65*, 578–596.
- 680 Maurer, S. P., Bieling, P., Cope, J., Hoenger, A., and Surrey, T. (2011). GTP $\gamma$ S  
681 microtubules mimic the growing microtubule end structure recognized by end-binding

- 682 proteins (EBs). *Proc. Natl. Acad. Sci. U.S.a.* *108*, 3988–3993.
- 683 Maurer, S. P., Cade, N. I., Bohner, G., Gustafsson, N., Boutant, E., and Surrey, T.  
684 (2014). EB1 Accelerates Two Conformational Transitions Important for Microtubule  
685 Maturation and Dynamics. *Curr. Biol.* *24*, 372–384.
- 686 Maurer, S. P., Fourniol, F. J., Bohner, G., Moores, C. A., and Surrey, T. (2012). EBs  
687 recognize a nucleotide-dependent structural cap at growing microtubule ends. *Cell* *149*,  
688 371–382.
- 689 McIntosh, J. R., O'Toole, E., Morgan, G., Austin, J., Ulyanov, E., Ataullakhanov, F., and  
690 Gudimchuk, N. (2018). Microtubules grow by the addition of bent guanosine  
691 triphosphate tubulin to the tips of curved protofilaments. *J. Cell Biol.* *265*,  
692 jcb.201802138.
- 693 Mickolajczyk, K. J., Geyer, E. A., Kim, T., Rice, L. M., and Hancock, W. O. (2018).  
694 Direct observation of individual tubulin dimers binding to growing microtubules. *bioRxiv*  
695 <https://doi.org/10.1101/418053>.
- 696 Minoura, I., Hachikubo, Y., Yamakita, Y., Takazaki, H., Ayukawa, R., Uchimura, S., and  
697 Muto, E. (2013). Overexpression, purification, and functional analysis of recombinant  
698 human tubulin dimer. *FEBS Lett.* *587*, 3450–3455.
- 699 Mitchison, T., and Kirschner, M. (1984). Dynamic instability of microtubule growth.  
700 *Nature* *312*, 237–242.
- 701 Molodtsov, M. I., Ermakova, E. A., Shnol, E. E., Grishchuk, E. L., McIntosh, J. R., and  
702 Ataullakhanov, F. I. (2005). A molecular-mechanical model of the microtubule. *Biophys.*  
703 *J.* *88*, 3167–3179.
- 704 Pamula, M. C., Ti, S.-C., and Kapoor, T. M. (2016). The structured core of human  $\beta$   
705 tubulin confers isotype-specific polymerization properties. *J. Cell Biol.* *213*, 425–433.
- 706 Peet, D. R., Burroughs, N. J., and Cross, R. A. (2018). Kinesin expands and stabilizes  
707 the GDP-microtubule lattice. *Nat Nanotechnol* *13*, 386–391.
- 708 Piedra, F.-A., Kim, T., Garza, E. S., Geyer, E. A., Burns, A., Ye, X., and Rice, L. M.  
709 (2016). GDP-to-GTP exchange on the microtubule end can contribute to the frequency  
710 of catastrophe. *Mol. Biol. Cell* *27*, 3515–3525.
- 711 Rice, L. M., Montabana, E. A., and Agard, D. A. (2008). The lattice as allosteric effector:  
712 structural studies of alphabeta- and gamma-tubulin clarify the role of GTP in microtubule  
713 assembly. *Proc. Natl. Acad. Sci. U.S.a.* *105*, 5378–5383.
- 714 Shima, T. *et al.* (2018). Kinesin-binding-triggered conformation switching of  
715 microtubules contributes to polarized transport. *J. Cell Biol.* *68*, jcb.201711178.

- 716 Ti, S.-C., Pamula, M. C., Howes, S. C., Duellberg, C., Cade, N. I., Kleiner, R. E., Forth,  
717 S., Surrey, T., Nogales, E., and Kapoor, T. M. (2016). Mutations in Human Tubulin  
718 Proximal to the Kinesin-Binding Site Alter Dynamic Instability at Microtubule Plus- and  
719 Minus-Ends. *Dev. Cell* *37*, 72–84.
- 720 VanBuren, V., Cassimeris, L., and Odde, D. J. (2005). Mechanochemical model of  
721 microtubule structure and self-assembly kinetics. *Biophys. J.* *89*, 2911–2926.
- 722 VanBuren, V., Odde, D. J., and Cassimeris, L. (2002). Estimates of lateral and  
723 longitudinal bond energies within the microtubule lattice. *Proc. Natl. Acad. Sci. U.S.a.*  
724 *99*, 6035–6040.
- 725 Vemu, A., Atherton, J., Spector, J. O., Moores, C. A., and Roll-Mecak, A. (2017).  
726 Tubulin isoform composition tunes microtubule dynamics. *Mol. Biol. Cell* *28*, 3564–3572.
- 727 Vemu, A., Atherton, J., Spector, J. O., Szyk, A., Moores, C. A., and Roll-Mecak, A.  
728 (2016). Structure and Dynamics of Single-isoform Recombinant Neuronal Human  
729 Tubulin. *J. Biol. Chem.* *291*, 12907–12915.
- 730 Walker, R. A., O'Brien, E. T., Pryer, N. K., Soboeiro, M. F., Voter, W. A., Erickson, H. P.,  
731 and Salmon, E. D. (1988). Dynamic instability of individual microtubules analyzed by  
732 video light microscopy: rate constants and transition frequencies. *J. Cell Biol.* *107*,  
733 1437–1448.
- 734 Widlund, P. O., Podolski, M., Reber, S., Alper, J., Storch, M., Hyman, A. A., Howard, J.,  
735 and Drechsel, D. N. (2012). One-step purification of assembly-competent tubulin from  
736 diverse eukaryotic sources. *Mol. Biol. Cell* *23*, 4393–4401.
- 737 Zakharov, P., Gudimchuk, N., Voevodin, V., Tikhonravov, A., Ataulakhanov, F. I., and  
738 Grishchuk, E. L. (2015). Molecular and Mechanical Causes of Microtubule Catastrophe  
739 and Aging. *Biophys. J.* *109*, 2574–2591.
- 740 Zanic, M., Widlund, P. O., Hyman, A. A., and Howard, J. (2013). Synergy between  
741 XMAP215 and EB1 increases microtubule growth rates to physiological levels. *Nature*  
742 *Cell Biology* *15*, 688–693.
- 743 Zhang, R., Alushin, G. M., Brown, A., and Nogales, E. (2015). Mechanistic Origin of  
744 Microtubule Dynamic Instability and Its Modulation by EB Proteins. *Cell* *162*, 849–859.
- 745 Zhang, R., LaFrance, B., and Nogales, E. (2018). Separating the effects of nucleotide  
746 and EB binding on microtubule structure. *Proc. Natl. Acad. Sci. U.S.a.* *115*, E6191–  
747 E6200.
- 748 Zhang, R., Roostalu, J., Surrey, T., and Nogales, E. (2017). Structural insight into TPX2-  
749 stimulated microtubule assembly. *Elife* *6*, 1518.

750

751

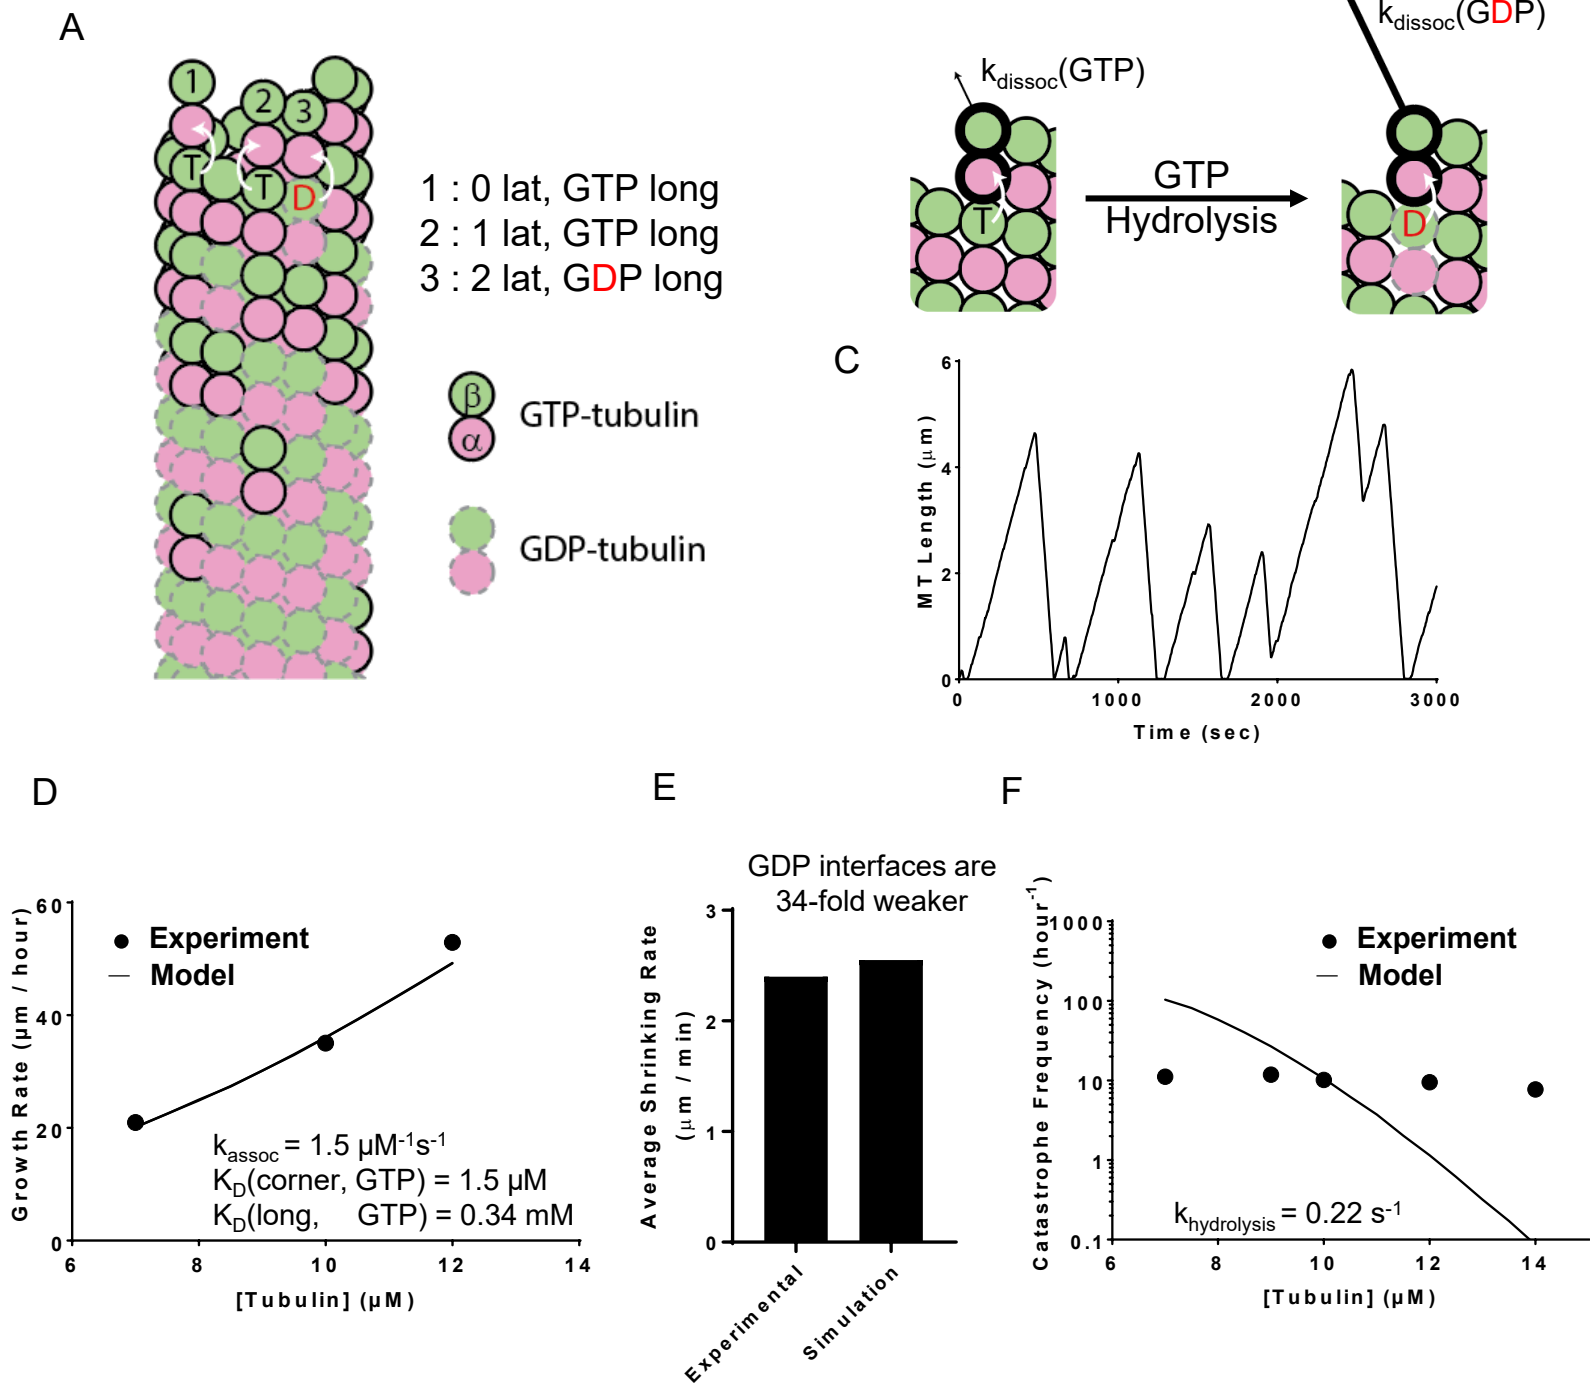

## Figure 1

Simulations of a 2-state biochemical model for microtubule dynamics. **(A)** Cartoon representation of a typical growing MT tip during a simulation.  $\alpha\beta$ -tubulin dimers are represented as pink and green circles; solid black and dashed grey outlines indicate GTP and GDP states, respectively. Dissociation rates depend on the number of lateral neighbors and the identity of the nucleotide at the longitudinal interface (white arrows indicate trans-acting nucleotide, see B). **(B)** Illustration of trans-acting nucleotide.  $\alpha\beta$ -tubulins with GTP at the longitudinal interface dissociate slower than  $\alpha\beta$ -tubulins with GDP at the longitudinal interface. **(C)** Representative plot showing simulated MT length vs time at  $10 \mu\text{M}$   $\alpha\beta$ -tubulin. The simulation parameters are given in panels D – F. Catastrophes occur naturally as a consequence of the biochemical rules. **(D)** Comparison between measured (black circles) and predicted (line) growth rates. Experimental data are taken from (Gardner *et al.*, 2011b; Coombes *et al.*, 2013). **(E)** Comparison between measured and predicted shrinking rates. **(F)** Comparison between measured (black circles) and predicted (line) catastrophe frequency at different  $\alpha\beta$ -tubulin concentrations. The 2-state model cannot recapitulate the measured concentration-dependence of the catastrophe frequency.

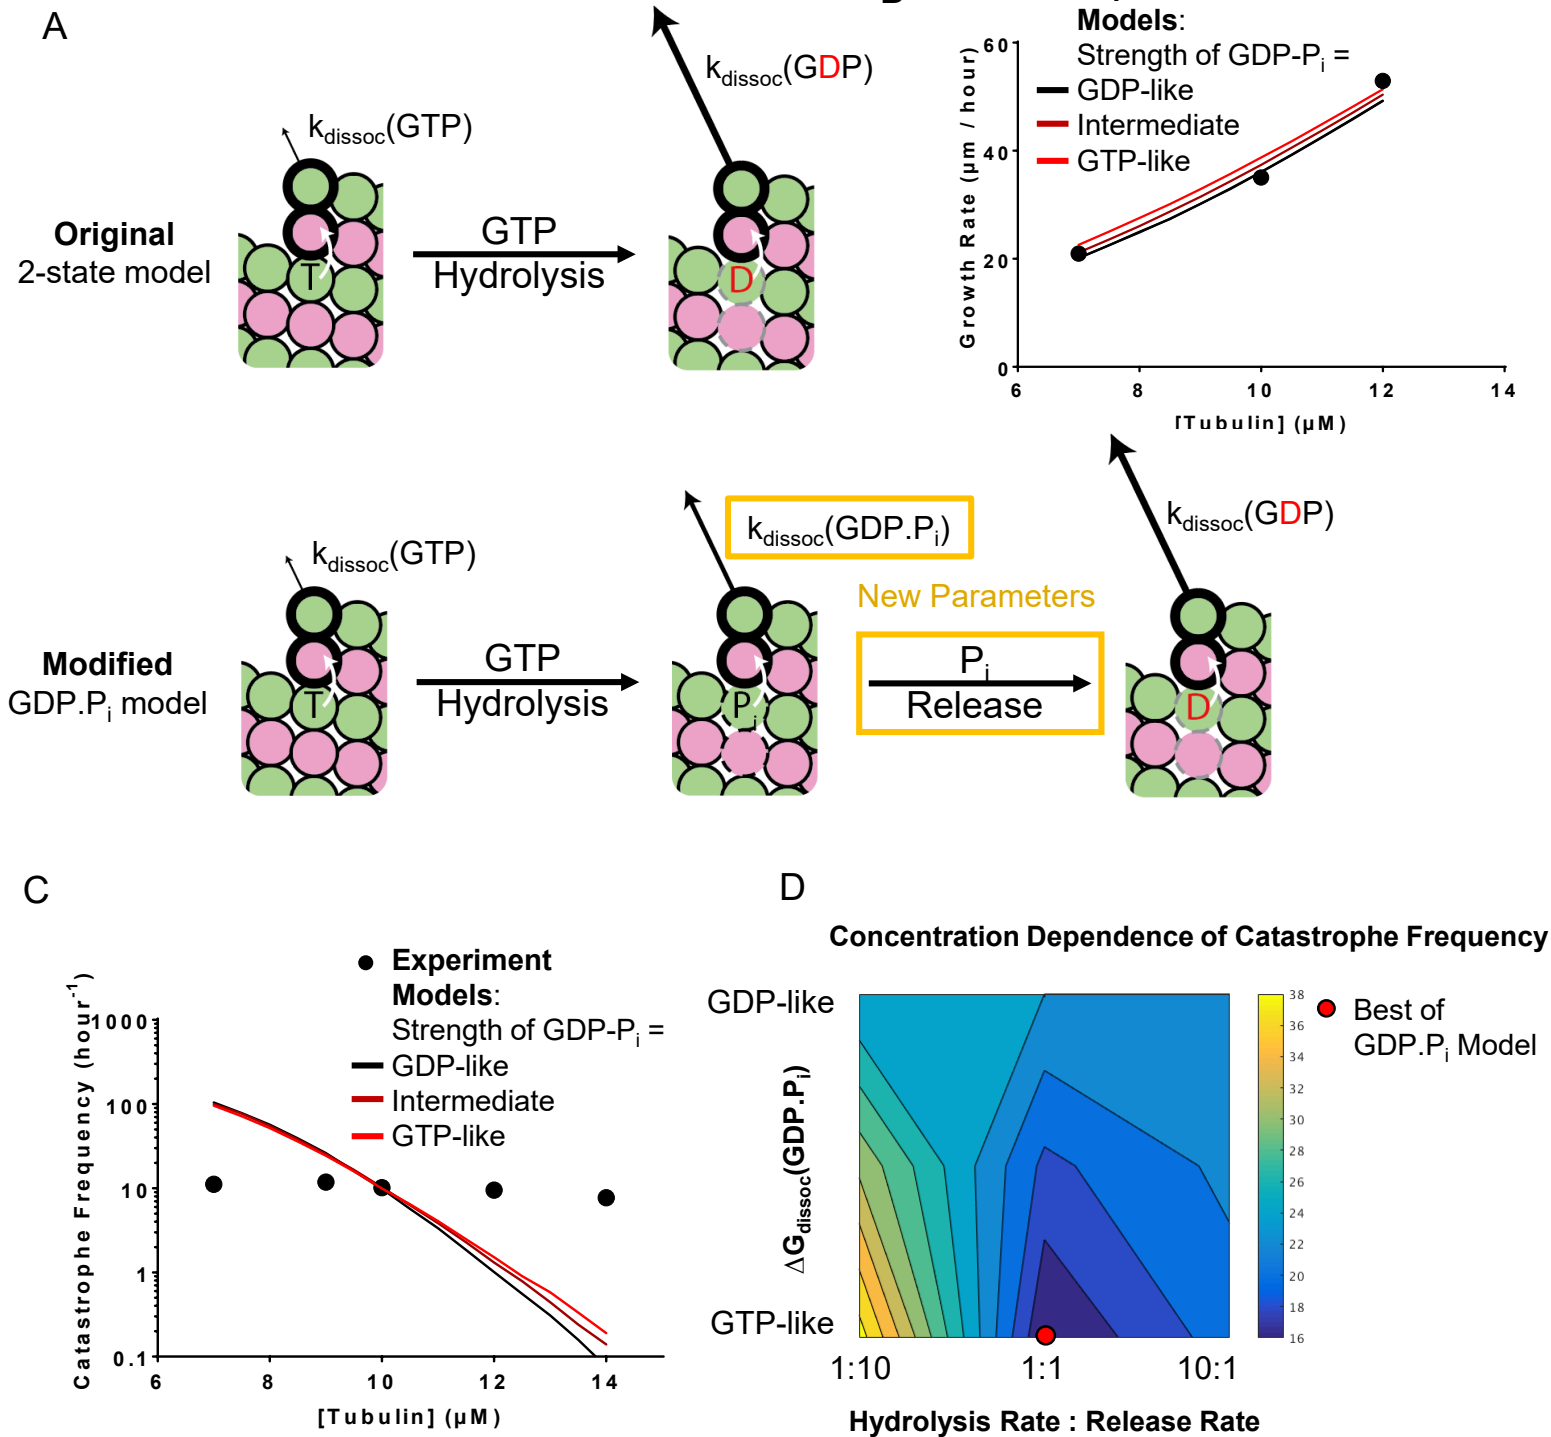



## Figure 2

A three state model that contains a GDP.P<sub>i</sub> intermediate. **(A)** Cartoons illustrating the differences between models without (top) and with (bottom) a GDP.P<sub>i</sub> intermediate. The GDP.P<sub>i</sub> intermediate requires two additional parameters: a rate constant for P<sub>i</sub> release, and another for the strength of the longitudinal interaction when GDP-P<sub>i</sub> is at the interface. **(B)** Comparison between measured (black circles) and predicted (lines; red, black correspond to GDP.P<sub>i</sub> interfaces having identical strength as GTP and GDP, interfaces respectively; brown corresponds to GDP.P<sub>i</sub> interfaces having intermediate strength) growth rates. All three scenarios can recapitulate observed growth rates. In this plot the ratio between the hydrolysis rate and the phosphate release rates have been set to 1:1. **(C)** Predicted catastrophe frequency as a function of concentration for different values for the strength of the GDP.P<sub>i</sub> longitudinal interface. Varying the strength of the GDP-P<sub>i</sub> interface has a limited effect on the concentration dependence of the catastrophe frequency. The ratio between the hydrolysis rate and the phosphate release rates have been set to 1:1. **(D)** Contour plot of the predicted concentration dependence of catastrophe. The concentration-dependence is defined as the ratio of catastrophe frequencies at 9 μM and 12 μM. The concentration dependence of the catastrophe frequency is at its lowest when the ratio between the hydrolysis and release is 1:1 and the strength of the longitudinal interface with GDP-P<sub>i</sub> is as strong as the interface with GTP.

A

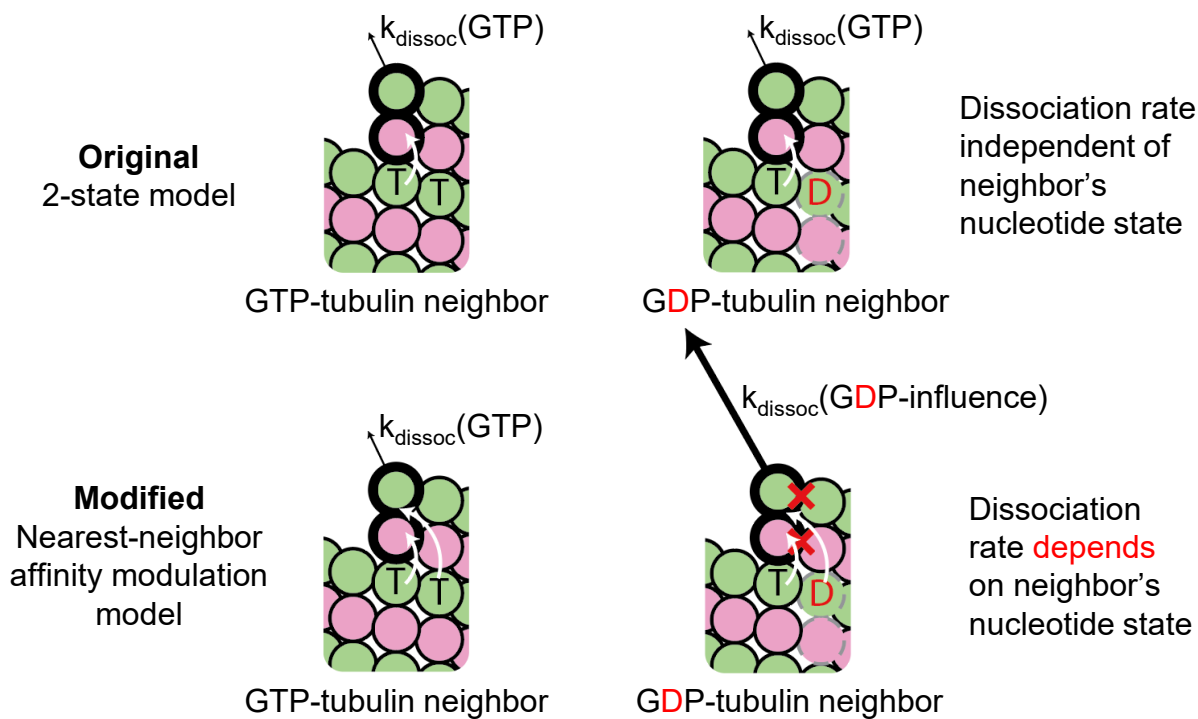

B

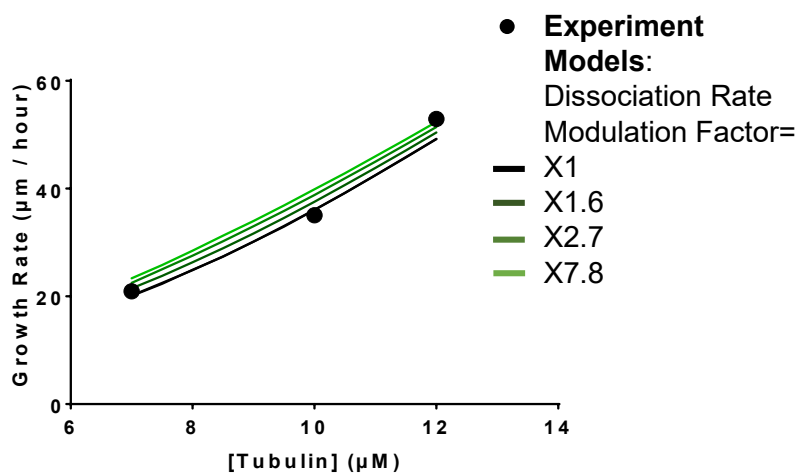

C

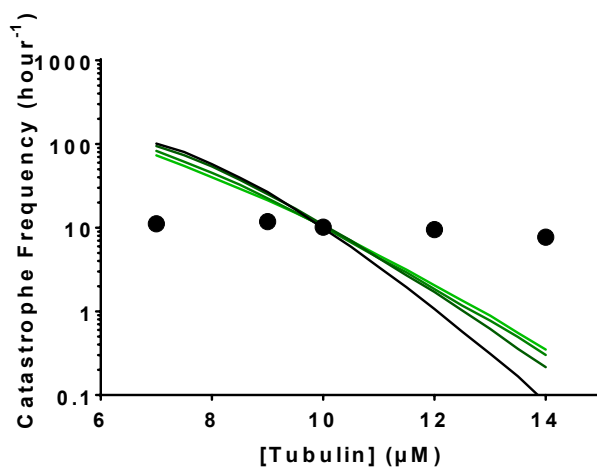

### Figure 3

A model that incorporates nearest-neighbor modulation of the strength of lattice contacts. **(A)** Cartoons illustrating the differences between models without (top) and with (bottom) the nearest-neighbor  $\alpha\beta$ -tubulin affinity modulation. Allowing the  $\alpha\beta$ -tubulin affinity modulation requires one additional parameter: a fold-increase in  $\alpha\beta$ -tubulin dissociation rate due to the nearest-neighbor influence. **(B)** Comparison between measured (black circles) and predicted (blackest line corresponds to 1-fold increase in dissociation rates and the greenest corresponds to the 7.8-fold increase) growth rates. All four scenarios can recapitulate observed growth rates. **(C)** Predicted catastrophe frequency as a function of concentration for different fold-increases in  $\alpha\beta$ -tubulin dissociation rate. Varying the magnitude of  $\alpha\beta$ -tubulin dissociation modulation has a limited effect on the concentration dependence of the catastrophe frequency.

# Figure 4

A

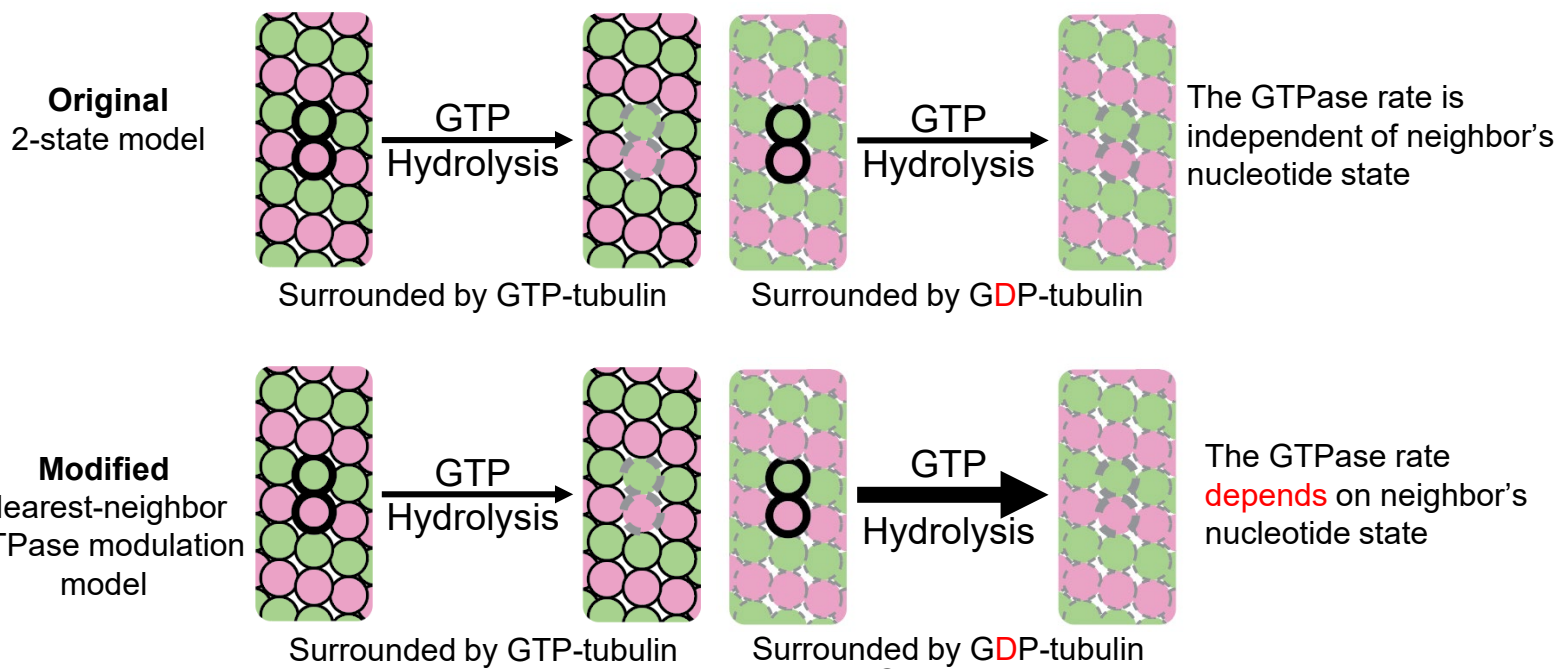

B

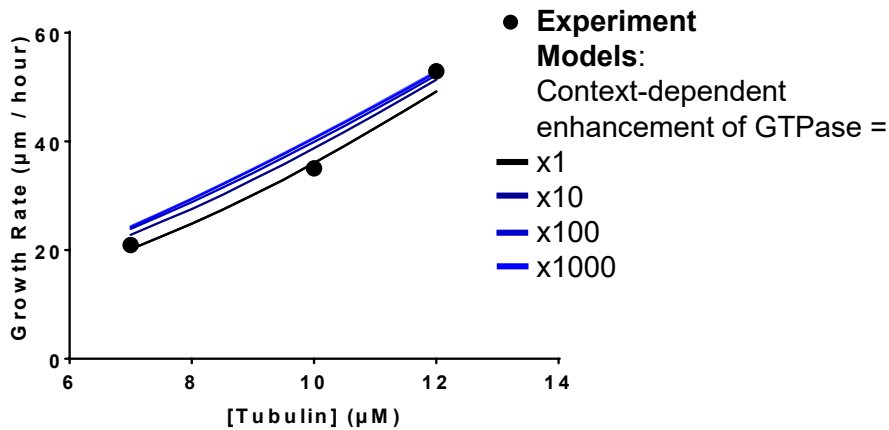

C

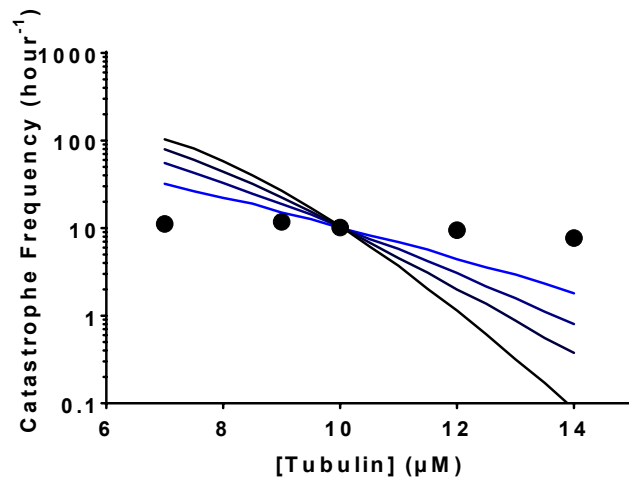

D

Lon-Range Propagation-Truncated

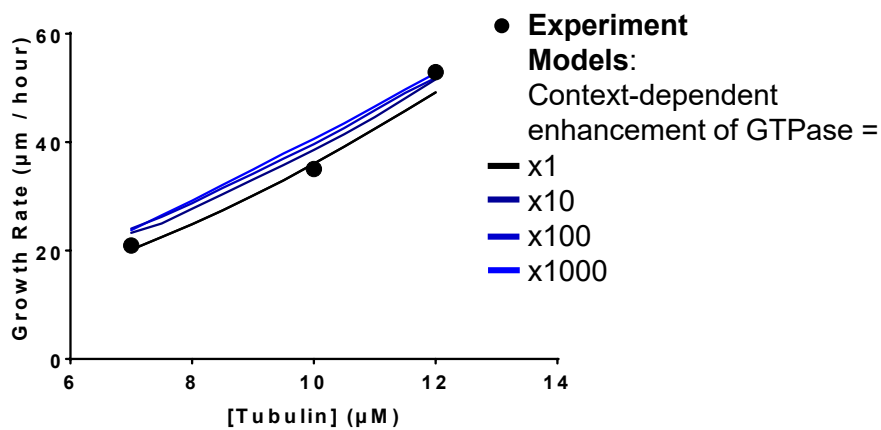

E

Lon-Range Propagation-Truncated

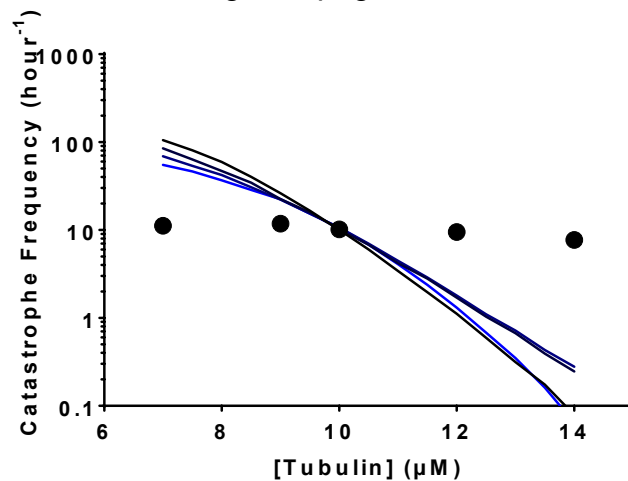

## Figure 4

A model that incorporates nearest-neighbor modulation of GTPase activity. **(A)** Cartoons illustrating the differences between models without (top) and with (bottom) the nearest-neighbor GTPase modulation. Allowing the GTPase rate modulation requires one additional parameter: the fold-increase in GTPase rate due to the nearest-neighbor influence. **(B)** Comparison between measured (black circles) and predicted (blackest line corresponds to 1-fold increase in GTPase rates and the bluest corresponds to the 1000-fold increase) growth rates. All four scenarios can recapitulate observed growth rates. **(C)** Predicted catastrophe frequency as a function of concentration for different fold-increases in GTPase rate. Varying the magnitude of GTPase rate modulation has a significant effect on the concentration dependence of the catastrophe frequency. **(D)** Comparison between measured (black circles) and predicted (blackest line corresponds to 1-fold increase in GTPase rates and the bluest corresponds to the 1000-fold increase) growth rates, in the propagation-limited GTPase model. All four scenarios can recapitulate observed growth rates. **(E)** Predicted catastrophe frequency as a function of concentration for different fold-increases in GTPase rate, in the propagation-limited GTPase model. Artificially limiting the propagation of wave-like GTPase activity reverts the changes in predicted concentration dependence of catastrophe frequency observed in the original nearest-neighbor GTPase modulation model.

A

**Original**  
2-state model  
-or-  
Long-range  
Affinity modulation  
Model  
(Range = 0)

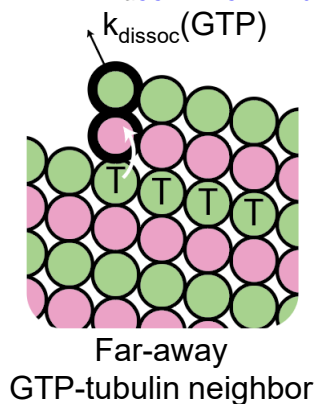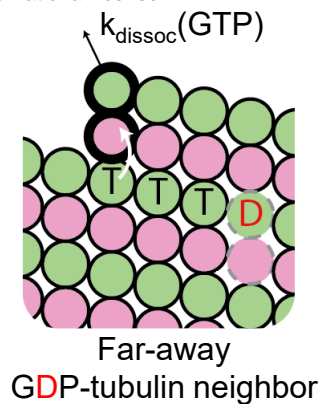

Dissociation rate  
independent of  
distant neighbor's  
nucleotide state

**Modified**  
Long-range  
Affinity modulation  
Model  
(Range = 3)

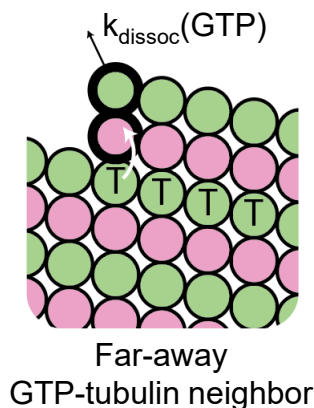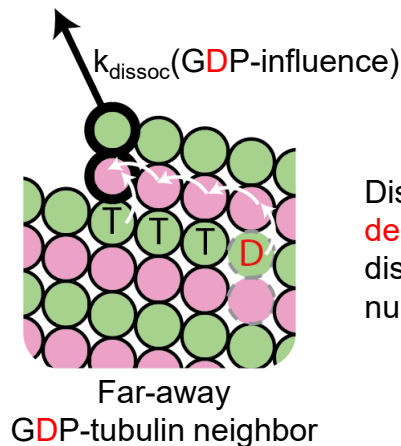

Dissociation rate  
**depends** on  
distant neighbor's  
nucleotide state

B

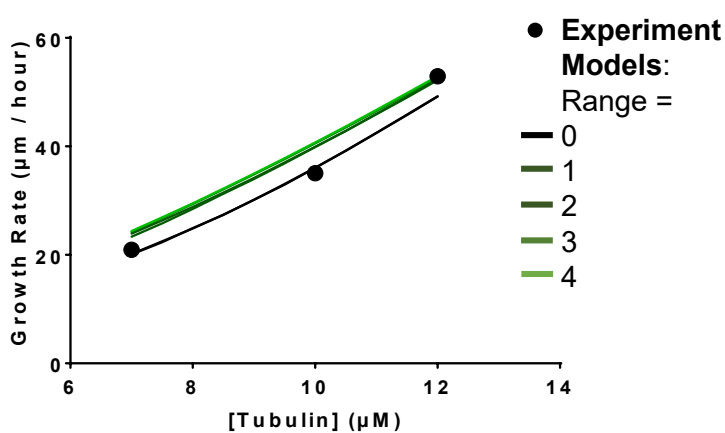

C

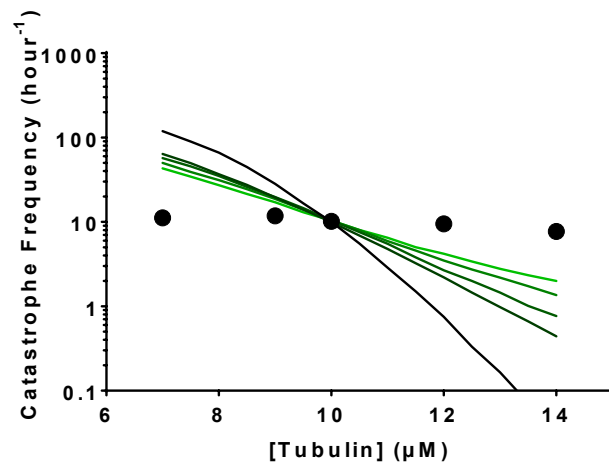

## Figure 5

A model that incorporates long-range modulation of the strength of lattice contacts. **(A)** Cartoons illustrating the differences between models without (top) and with (bottom) the long-range  $\alpha\beta$ -tubulin affinity modulation. Allowing the  $\alpha\beta$ -tubulin affinity modulation requires two additional parameter: a fold-increase in  $\alpha\beta$ -tubulin dissociation rate due to the nearest-neighbor influence and the maximum range of modulation. **(B)** Comparison between measured (black circles) and predicted (blackest line corresponds to the modulation range of 0 and the greenest corresponds to the modulation range of 4) growth rates. All five scenarios can recapitulate observed growth rates. In this plot the dissociation rate of the modulated  $\alpha\beta$ -tubulin is increased by 7.8-fold. **(C)** Predicted catastrophe frequency as a function of concentration for different maximum range of modulation. Varying the maximum range of modulation has significant effect on the concentration dependence of the predicted catastrophe frequency. The dissociation rate of the modulated  $\alpha\beta$ -tubulin is increased by 7.8-fold.



# Figure 6

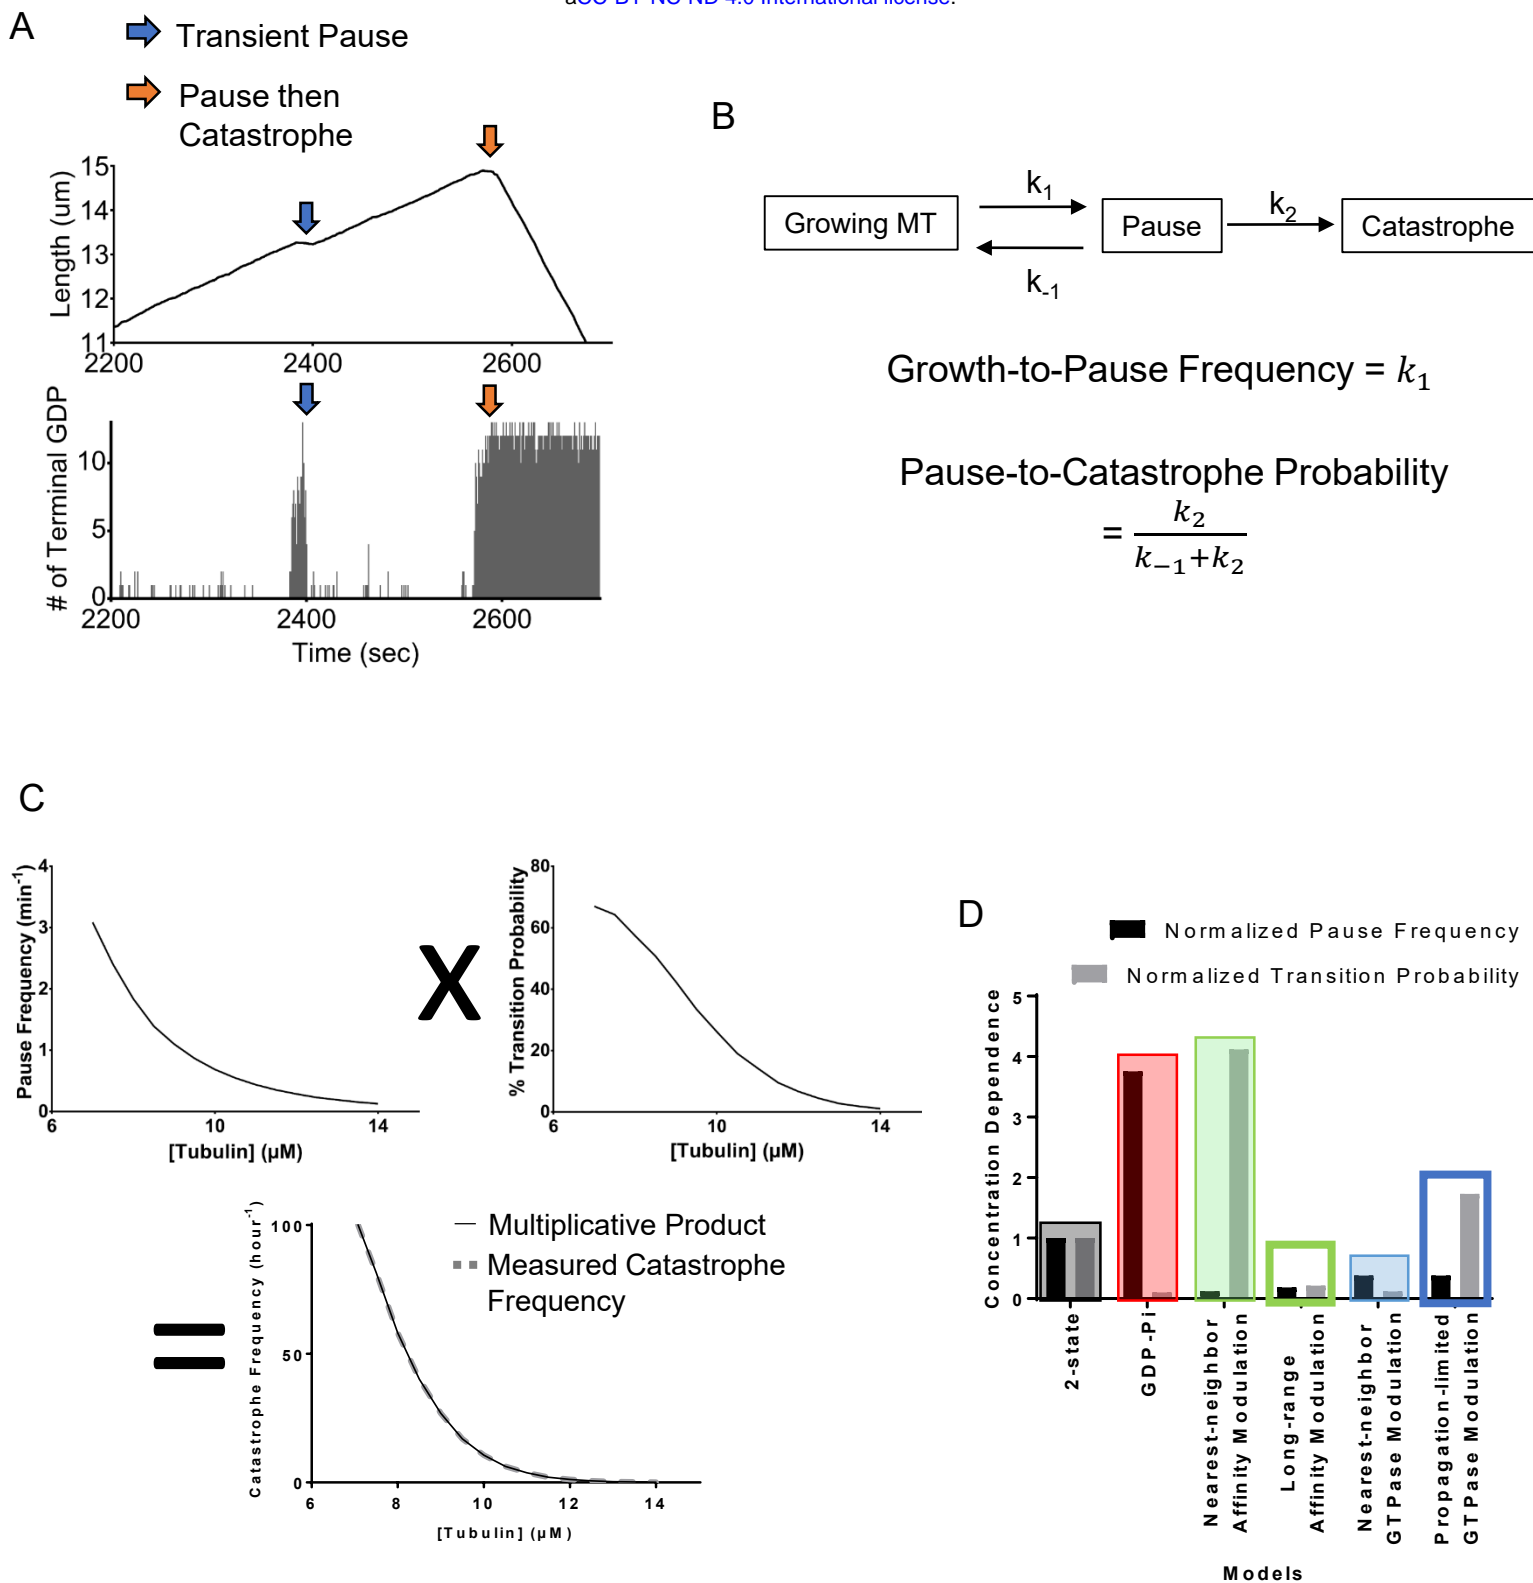

## Figure 6

Microtubule catastrophe can be decomposed into two separate steps. **(A)** The plot of the MT length vs time (top panel) and the corresponding plot of terminal GDP-tubulin vs time (bottom panel). The exposure of GDP-tubulins at the end of some protofilaments (blue arrow) leads to a transient pausing. The exposure at the end of all protofilaments can follow partial loss of the GTP stabilizing cap (orange arrow) leading to a transient pausing followed by a catastrophe. **(B)** A diagram of transient pausing and catastrophe as elementary processes (top). “Growth-to-pause” frequencies and “pause-to-catastrophe” probability defined in terms of the reaction rates to the elementary processes (bottom). **(C)** The plot of “growth-to-pause” frequencies (top left), “pause-to-catastrophe” probabilities (top right), and the catastrophe frequencies (bottom) as functions of  $\alpha\beta$ -tubulin concentrations in two-state model. The multiplicative product (black line, bottom plot) of the “growth-to-pause” frequencies and the “pause-to-catastrophe” probabilities match the value of the predicted catastrophe frequency (gray dashed line, bottom plot). **(D)** The concentration dependencies of the “growth-to-pause” frequencies and the “pause-to-catastrophe” probabilities of different models normalized to two-state model. Here, we defined the concentration dependence as the ratio of the “growth-to-pause” frequencies or the “pause-to-catastrophe” probabilities at 9  $\mu\text{M}$  over 12  $\mu\text{M}$ .
